# Supplementary material for: Diversity and Reassortment Rate of Influenza a Viruses in Wild Ducks and Gulls
Source: Preprints.org preprint supplement (doi:10.20944/preprints202105.0050.v1), 2021-05-05
Supplement: Supplementary file 1 [file Table S1 list of viruses_.xlsx]

## Sheet: list of viruses
Isolate	designation	Year	PB2	PB1	PA	HA	NP	NA	M	NS
A/gull/Moscow/3100/2006(H6N2)	gull/M/3100/2006	2006	EU152234	EU152235	EU152236	EU152237	EU152238	EU152239	EU152240	EU152241
A/duck/Moscow/3661/2008(H4N6)	M/3661/2008	2008	MF680290	MF680291	MF680292	MF680293	MF680294	MF680295	MF680296	MF680297
A/duck/Moscow/3556/2008(H3N1)	M/3556/2008	2008	MN692225	MN692226	MN692227	MN692228	MN692229	MN692230	MN692231	MN692232
A/avian/Moscow/3641/2008(H11N9)	M/3641/2008	2008	MT773558	MT773559	MT773560	GU991377	MT773561	MT773562	MT773563	MT773564
A/duck/Moscow/3740/2009(H4N6)	M/3740/2009	2009	MF422098	MF422099	MF422100	CY120773	MF422101	MF422102	MF422103	MF422104
A/duck/Moscow/3799/2009(H4N6)	M/3799/2009	2009	MF422105	MF422106	MF422107	CY120774	MF422108	MF422109	MF422110	MF422111
A/duck/Moscow/3735/2009 (H4N6)	M/3735/2009	2009	MF422091	MF422092	MF422093	CY120772	MF422094	MF422095	MF422096	MF422097
A/duck/Moscow/3806/2009(H3N8)	M/3806/2009	2009	MN692266	MN692267	MN692268	MN692269	MN692270	MN692271	MN692272	MN692273
A/duck/Moscow/3720/2009(H6N2)	M/3720/2009	2009	MW269601	MW269602	MW269603	CY120771	MW269604	MW269605	MW269606	MW269607
A/duck/Moscow/4203/2010(H3N8)	M/3806/2009	2010	MN700132	MN700133	MN700134	MN700135	MN700136	MN700137	MN700138	MN700139
А/duck/Moscow/4238/2010(H3N6)	M/4238/2010	2010	MN700140	MN700141	MN700142	MN700143	MN700144	MN700145	MN700146	MN700147
A/duck/Moscow/4242/2010(H3N8)	M/4242/2010	2010	MN700148	MN700149	MN700150	MN700151	MN700152	MN700153	MN700154	MN700155
A/duck/Moscow/4298/2010(H3N8)	M/4298/2010	2010	MN700156	MN700157	MN700158	MN700159	MN700160	MN700161	MN700162	MN700163
A/duck/Moscow/4031/2010(H6N2)	M/4031/2010	2010	MT773263	MT773264	MT773265	MT773266	MT7732637	MT773268	MT773269	MT773270
A/duck/Moscow/4182/2010 (H5N3)	M/4182/2010	2010	KF885672	KF885673	KF885674	KF885675	KF885676	KF885677	KF885678	KF885679
A/duck/Moscow/4652/2011(H4N6)	M/4652/2011	2011	KX518711	KX518712	KX518713	KX518714	KX518715	KX518716	KX518717	KX518718
A/duck/Moscow/4641/2011(H4N6)	M/4641/2011	2011	MF422112	MF422113	MF422114	MF422115	MF422116	MF422117	MF422118	MF422119
A/duck/Moscow/4528/2011(H4N6)	M/4528/2011	2011	MF673532	MF673533	MF673534	MF673535	MF673536	MF673537	MF673538	MF673539
A/duck/Moscow/4518/2011(H4N6)	M/4518/2011	2011	MF673524	MF673525	MF673526	MF673527	MF673528	MF673529	MF673530	MF673531
A/duck/Moscow/4643/2011 (H4N6)	M/4643/2011	2011	KX509943	KX509944	KX509945	KX509946	KX509947	KX509948	KX509949	KX509950
A/duck/Moscow/4524/2011(H3N2,8)	M/4524/2011	2011	MN692213	MN692214	MN692215	MN692216	MN692217	MN692218 MN692219	MN692220	MN692221
А/duck/Moscow/4494/2011(H3N8)	M/4494/2011	2011	MN759696	MN759697	MN759698	MN759699	MN759700	MN759701	MN759702	MN759703
A/duck/Moscow/4661/2011(H3N8)	M/4661/2011	2011	MN759712	MN759713	MN759714	MN759715	MN759716	MN759717	MN759718	MN759719
А/duck/Moscow/4681/2011(H3N8)	M/4681/2011	2011	MN759704	MN759705	MN759706	MN759707	MN759708	MN759709	MN759710	MN759711
A/duck/Moscow/4781/2012 (H4N6)	M/4781/2012	2012	KX530510	KX530511	KX530512	KX530513	KX530514	KX530515	KX530516	KX530517
A/duck/Moscow/4843/2012(H4N6)	M/4843/2012	2012	MF673548	MF673549	MF673550	MF673551	MF673552	MF673553	MF673554	MF673555
A/duck/Moscow/4771/2012(H4N6)	M/4771/2012	2012	MF673540	MF673541	MF673542	MF673543	MF673544	MF673545	MF673546	MF673547
A/duck/Moscow/4780/2012(H3N8)	M/4780/2012	2012	MT773360	MT773361	MT773362	MT773363	MT773364	MT773365	MT773366	MT773367
A/duck/Moscow/4788/2012(H3N8)	M/4788/2012	2012	MT773383	MT773384	MT773385	MT773386	MT773387	MT773388	MT773389	MT773390
A/duck/Moscow/4970/2013(H1N1)	M/4970/2013	2013	MW897994	MW897995	MW897996	MF969258	MW897997	MF969259	MW897998	MW897999
A/duck/Moscow/4952/2013(H5N3)	M/4952/2013	2013	MN588194	MN588195	MN588196	MN588197	MN588198	MN588199	MN588200	MN588201
A/duck/Moscow/4971/2013(H5N3)	M/4971/2013	2013	MN588283	MN588284	MN588285	MN588286	MN588287	MN588288	MN588289	MN588290
A/duck/Moscow/5037/2014(H3N8)	M/5037/2014	2014	MT773420	MT773421	MT773422	MT773423	MT773424	MT773425	MT773426	MT773427
A/duck/Moscow/5662/2018(H1N2)	M/5662/2018	2018	MN588291	MN588292	MN588293	MN588294	MN588295	MN588296	MN588297	MN588298
A/duck/Moscow/5586/2018(H1N2)	M/5586/2018	2018	MN435632	MN435633	MN435634	MN435635	MN435636	MN435637	MN435638	MN435639
A/duck/Moscow/5712U/2019(H11N6)	M/5712U/2019	2019	MW186784	MW186785	MW186786	MW186787	MW186788	MW186789	MW186790	MW186791
A/duck/Moscow/5743/2019(H1N1)	M/5743/2019	2019	MW186793	MW186794	MW186795	MW186796	MW186797	MW186798	MW186799	MW186800
A/duck/Moscow/5744/2019(H1N1)	M/5744/2019	2019	MW186801	MW186802	MW186803	MW186804	MW186805	MW186806	MW186807	MW186808
