# Supplementary material for: Diversity and Reassortment Rate of Influenza a Viruses in Wild Ducks and Gulls
Source: Preprints.org preprint supplement (doi:10.20944/preprints202105.0050.v1), 2021-05-05
Supplement: Supplementary file 2 [file Table S2 duck viruses.xlsx]

## Sheet: duck viruses 
Table S2. Duck IAVs isolated in Moscow and Netherlands in 2006-2019.
		Clades numbers
Collection Date	Strain	PB2	PB1	PA	NP	M	NS
09/22/2006	64/2006|H1N1	8b	1	2b	12	12	B13		Viruses are grouped by hemagglutinin subtype. The cells contain clade and subclade numbers for the corresponding genes. Colored cells correspond to strains, all genes of which matching by number of subclade. The names of the strains are marked in ocher color, and the corresponding lines colored light yellow. If the date of collection coincide, then the names of strains writed in black. If the dat…
28/06/2006	30/2006|H1N4	8b	1	9	11	8	6c
08/25/2006	23/2006|H1N1	8b	10	8a	9A	9	2b
09/18/2006	46/2006|H1N1	12	1	2b	12	12	B11
09/30/2009	16/2009|H1N1	8a	13	5c	11	5a	B9a
12/21/2009	25/2009|H1N1	12	4B	6b	3	5f	5
12/21/2009	26/2009|H1N1	5	4B	1	5	5f	5
12/21/2009	28/2009|H1N1	5	4B	6b	5	5f	5
12/03/2010	51/2010|H1N1	9	12c	2b	13	5e	2c
12/08/2010	53/2010|H1N1	10	2	2a	13	12	B9b
12/08/2011	37/2011|H1N1	5	2	2a	6A	4D	4b
10/23/2012	8/2012|H1N1	4	10	3a	9B	7	4c
02/23/2012	6/2012|H1N1	9	7	3b	9B	7	4b
07/09/2012	7/2012|H1N1	9	9C	2a	9B	7	4b
11/24/2012	20/2012|H1N1	10	7	2a	6B	7	4c
09/16/2013	5/2013|H1N1	10	7	2a	6B	7	4c
10/01/2013	M/4970/2013 H1N1	6	5	8a	10c	4D	B9d
09/15/2014	23/2014|H1N1	10	4C	4	6C	4D	3e
09/15/2014	26/2014|H1N1	10	4C	4	6C	4D	3e
08/27/2014	18/2014|H1N1	4	4C	5b	9B	13	B11
11//2018	M/5662/2018 H1N2	11	12A	5a	10b	4E	6a
10//2018	M/5586/2018 H1N2	11	12A	5a	10b	4E	6a
10/15/2019	M/5743/2019|H1N1	6	5	2a	10b	4E	B11
10/15/2019	M/5744/2019|H1N1	6	5	2a	10b	4E	B11
28/06/2006	31/2006|H2N2	5	11	3b	2A	11	6c
29/06/2007	14/2007|H2N2	1b	2	6b	9A	6	6a
30/06/2008	12/2008|H2N3	12	2	9	1	4E	6a
30/06/2008	37/2008|H2N3	8a	9B	6b	13	4E	3b
30/06/2008	58/2008|H2N3	8a	9B	6b	13	4E	3b
02/07/2010	1/2010|H2N3	10	13	8b	9B	13	B10
02/07/2010	29/2010|H2N3	12	12c	2a	13	4D	B11
10/03/2011	24/2011|H2N3	10	2	4	9B	4E	4b
10/05/2011	25/2011|H2N3	8a	4C	2b	13	5e	B12
10/24/2011	33/2011|H2N2	10	12d	8b	13	4D	B13
01/07/2013	22/2013|H2N3	10	10	5b	9B	5b	3e
08/27/2014	14/2014|H2N9	10	10	8b	10b	4A	B11
08/29/2014	16/2014|H2N9	10	10	8b	10b	4A	B11
09/03/2006	3/2006|H3N8	1c	10	8a	1	2	4e
09/11/2006	34/2006|H3N8	5	9B	8c	2B	13	3a
09/18/2006	60/2006|H3N8	1c	10	8b	1	2	4e
10/15/2008	62/2008|H3N6	8b	4A	8a	9B	6	1
08/22/2008	6/2008|H3N6	5	10	2b	2A	5c	2a
08/22/2008	7/2008|H3N8	5	10	2b	1	5c	2a
10/08/2008	39/2008|H3N2	8b	9B	2b	2A	13	B13
10//2008	M/3556/2008 H3N1	12	13	7	3	12	3d
10/08/2008	51/2008|H3N2	8b	9B	2b	5	5f	B13
09/09/2009	13/2009|H3N3	5	4B	1	5	5b	5
09//2009	M/3806/2009 H3N8	11	4C	6b	10d	3	B11
10/08/2010	34/2010|H3N2	9	9B	3b	13	13	B11
09/21/2010	30/2010|H3N8	5	12d	2b	1	4D	B9b
10//2010	M/4238/2010 H3N6	4	4C	3a	9B	10	2b
10//2010	M/4298/2010 H3N8	4	9C	1	10e	5e	4d
11//2010	M/4203/2010 H3N8	4	4C	3a	9B	10	2b
11//2010	M/4242/2010 H3N8	12	12A	2b	3	3	6a
09//2011	M/4494/2011 H3N8	4	4A	5b	10d	7	4c
10//2011	M/4681/2011 H3N8	4	4A	5b	10d	7	4c
09/20/2011	17/2011|H3N8	10	12c	8b	10d	9	2a
10//2011	M/4661/2011 H3N8	12	9C	6b	10d	4E	3e
01/10/2011	M/4524/2011 H3N2 N8	4	4C	5b	10d	7	4c
01/10/2012	M/4780/2012|H3N8	4	9C	5a	4	3	B12
10/01/2012	13/2012|H3N8	10	4C	3a	13	13	3e
12/31/2013	21/2013|H3N2	4	9B	3a	6C	3	6b
08/17/2012	16/2012|H3N2	4	9B	3a	6C	3	6b
04/07/2012	M/4788/2012 H3N8	4	4C	3a	4	10	4c
10/08/2013	8/2013|H3N8	10	12A	5b	6A	4A	3e
10/14/2013	29/2013|H3N8	4	5	8b	4	3	B9d
10/01/2013	6/2013|H3N8	9	12A	3a	5	7	3e
09/10/2013	2/2013|H3N6	10	5	5b	9B	5e	2c
09/10/2013	3/2013|H3N6	10	5	5b	9B	5e	2c
01/10/2014	M/5037/2014|H3N8	11	5	5b	10a	9	3c
08/16/2015	33/2015|H4N6	4	7	4	10d	4A	B11
08/22/2015	56/2015|H3N2	11	5	5a	6C	4E	B11
08/29/2015	37/2015|H3N8	6	5	5b	6C	5e	4b
08/15/2016	21/2016|H3N2	6	4C	5a	6C	4D	4b
09/18/2006	53/2006|H4N2	12	3	6a	11	5b	B11
06/03/2006	6/2006|H4N6	1b	1	8a	1	3	B10
11/22/2007	18/2007|H4N6	1b	10	8a	7	4B	6a
10/06/2008	55/2008|H4N6	6	4A	6b	1	5b	6b
12/14/2008	70/2008|H4N6	6	10	8b	13	3	4e
10/21/2008	M/3661/2008 H4N6	12	13	7	12	6	3d
09//2009	M/3735/2009 H4N6	3	9C	1	10d	1	B11
09//2009	M/3740/2009 H4N6	2	9C	1	10e	5e	B11
09//2009	M/3799/2009 H4N6	2	9C	1	10e	1	B11
12/21/2009	27/2009|H4N6	2	9C	1	10d	5e	B11
11/29/2010	49/2010|H4N6	5	9B	2a	10d	5b	4e
09/13/2010	26/2010|H4N6	10	12A	2b	9B	4E	B9b
08/15/2011	7/2011|H4N6	10	12c	1	10d	5b	3d
09/30/2011	22/2011|H4N6	1b	5	2b	13	4F	6a
10//2011	M/4643/2011 H4N6	10	10	8b	9B	4E	2c
10//2011	M/4518/2011 H4N6	12	9B	5a	9B	5e	2c
10/19/2011	M/4641/2011 H4N6	12	4C	5a	9B	5e	4c
10/04/2011	M/4528/2011 H4N6	12	4C	5a	10d	5e	4c
08/21/2012	18/2012|H4N2	4	4A	3a	6C	7	2b
09/07/2012	19/2012|H4N6	10	9B	8b	9B	7	4c
10//2012	M/4771/2012 H4N6	6	4A	3a	3	7	4c
10//2012	M/4781/2012 H4N6	4	4C	3a	3	7	3e
10//2012	M/4843/2012 H4N6	4	4C	3a	3	7	4c
09/16/2013	24/2013|H4N6	9	4C	5b	4	4A	B11
12/04/2013	10/2013|H4N6	4	12A	2a	5	4A	2c
08/26/2014	21/2014|H4N6	10	12A	8b	10d	1	2b
07/21/2014	30/2014|H4N6	4	5	4	6C	4A	4c
08/22/2015	35/2015|H4N6	11	9B	1	10b	4A	B11
07/28/2017	27/2017|H4N6	10	12c	5a	10c	1	B11
08/01/2017	73/2017|H4N6	10	12c	5a	10c	4E	B11
08/26/2017	89/2017|H4N6	10	12c	5a	10c	4E	B11
09/11/2006	36/2006|H5N3	1b	8	5c	11	8	4f
09/18/2006	43/2006|H5N2	12	6	3b	11	5b	B10
09/16/2006	12/2006|H5N2	13	11	3b	2A	3	6c
09/22/2006	63/2006|H5N2	8b	9B	3b	11	3	B10
09/22/2008	28/2008|H5N2	12	4A	7	8B	3	B9a
09/23/2008	30/2008|H5N3	1a	4A	6b	1	13	6b
10/08/2008	38/2008|H5N3	1a	4A	6b	9B	4B	B11
10/09/2008	52/2008|H5N2	12	9B	8b	1	13	6b
01/30/2008	1/2008|H5N3	5	13	8d	1	13	B10
10/26/2009	19/2009|H5N3	1a	4A	6b	11	13	3d
10/26/2009	20/2009|H5N3	1a	4A	6b	11	13	3d
02/02/2009	5/2009|H5N2	8b	9B	6b	13	3	B10
11//2010	M/4182/2010 H5N3	11	4A	2a	10d	3	3d
09/17/2010	28/2010|H5N2	12	4A	2b	4	13	6a
10/20/2011	32/2011|H5N2	4	9C	6b	10d	3	B13
11//2013	M/4952/2013 H5N3	11	4A	5b	10b	6	2b
11//2013	M/4971/2013 H5N3	4	4C	6b	10d	10	2b
09/16/2015	52/2015|H5N6	4	4C	5b	10d	4E	4b
09/15/2015	41/2015|H5N1	4	4C	5b	10c	4E	4b
10//2006	M/3100/2006 H6N2	1c	10	7	1	6	6b
09/16/2006	40/2006|H6N8	12	3	3b	8A	13	B10
10/21/2006	78/2006|H6N8	8b	10	3b	10a	13	4e
28/06/2006	71/2006|H6N2	12	10	8d	13	9	B12
29/06/2007	11/2007|H6N	8a	11	8a	9B	4C	B9e
11/01/2007	13/2007|H6N5	8a	11	8a	9B	4C	B9e
11/09/2007	15/2007|H6N8	12	10	8b	2B	12	7
12/07/2007	19/2007|H6N2	6	4A	3a	1	12	B9a
11/15/2007	16/2007|H6N8	12	10	3b	2B	5c	B13
01/07/2008	3/2008|H6N2	7	10	2b	2A	1	3c
09/10/2008	5/2008|H6N8	12	13	8a	1	7	B10
09/05/2008	32/2008|H6N1	1b	10	5c	1	6	3a
09/22/2008	31/2008|H6N1	1b	10	5c	1	6	3a
09/27/2008	8/2008|H6N1	1b	10	5c	1	6	3a
11/27/2008	76/2008|H6N8	12	9A	8b	4	6	B13
01/09/2009	M/3720/2009|H6N2	6	4A	2b	3	12	B11
10/02/2009	15/2009|H6N8	8a	13	5c	11	13	B9a
10/06/2009	17/2009|H6N8	12	9B	2b	5	4A	B9d
10/08/2009	18/2009|H6N2	12	4A	8a	4	4A	6a
12/01/2009	24/2009|H6N1	1b	13	2b	6A	4E	B10
01/09/2010	M/4031/2010|H6N2	12	4A	2a	13	13	3c
09/03/2010	18/2010|H6N8	10	9B	6b	9B	5b	3e
09/14/2011	15/2011|H6N8	4	4C	3a	6B	3	B11
09/24/2011	20/2011|H6N8	4	4C	3a	6B	3	B11
11/04/2011	1/2011|H6N2	9	12c	8b	9B	4D	2c
10/19/2011	30/2011|H6N4	10	5	8a	10d	4D	3a
09/05/2012	10/2012|H6N1	9	4C	2a	9B	13	B11
10/18/2012	12/2012|H6N1	12	4C	3a	6B	4E	2b
10/15/2013	9/2013|H6N8	6	4A	3a	6A	3	2b
11/22/2014	11/2014|H6N2	10	5	4	10c	4D	B9d
10/01/2014	7/2014|H6N2	10	5	4	10c	5e	B9d
10/28/2014	9/2014|H6N2	10	5	3b	6C	4A	B11
09/05/2015	59/2015|H6N5	10	12A	5a	6C	4E	4b
09/12/2015	60/2015|H6N5	10	12A	5a	6C	4E	4b
28/06/2006	29/2006|H7N2	1b	10	8a	9A	6	7
29/06/2007	22/2007|H7N1	8a	6	8a	1	9	6b
02/23/2008	86/2008|H7N1	12	9B	8b	9A	5b	3a
10/15/2008	61/2008|H7N1	3	4A	8b	2A	9	B11
10/15/2008	60/2008|H7N1	3	4A	8b	2A	9	B11
12/17/2008	82/2008|H7N7	12	10	8c	13	4E	B9b
12/29/2008	77/2008|H7N1	5	10	6b	11	4B	3a
12/29/2008	78/2008|H7N1	5	10	6b	11	6	3a
01/15/2009	3/2009|H7N7	12	4B	3b	3	7	3c
01/17/2009	4/2009|H7N7	12	4B	3b	3	7	3c
01/09/2009	2/2009|H7N7	12	4B	3b	3	7	3c
02/02/2009	6/2009|H7N7	12	4B	3b	3	7	3c
02/02/2009	7/2009|H7N7	12	4B	3b	3	7	3c
02/23/2011	1/2011|H7N7	11	9B	7	13	5b	2c
07/08/2010	4/2010|H7N3	12	2	6b	5	5b	6a
07/20/2010	5/2010|H7N3	12	2	6b	5	5b	6a
12/24/2011	40/2011|H7N1	4	12c	1	6A	5e	B9c
12/24/2011	43/2011|H7N1	4	12c	1	6A	5e	B9c
12/24/2011	44/2011|H7N1	4	12c	1	6A	5e	B9c
12/27/2011	48/2011|H7N1	4	12c	1	6A	5e	B9c
01/10/2012	31/2012|H7N1	4	12c	1	6A	5e	B9c
04/09/2013	23/2013|H7N3	12	7	8b	6B	13	4c
12/09/2013	11/2013|H7N7	10	7	5b	6C	7	B9d
12/10/2013	13/2013|H7N7	10	7	5b	6C	7	B9d
01/26/2013	1/2013|H7N7	10	9B	6b	4	5b	4b
09/30/2014	24/2014|H7N3	10	12A	5b	6C	4A	4b
10/28/2014	8/2014|H7N5	10	12A	5b	6C	4E	4b
06/27/2015	18/2015|H7N7	11	4C	5b	10c	4A	B11
01/24/2015	3/2015|H7N7	10	12A	1	5	4E	B11
01/16/2015	2/2015|H7N7	10	12A	1	5	4E	B11
07/24/2006	11/2006|H8N4	8b	9A	5c	1	5c	B10
07/24/2006	13/2006|H8N4	8b	9A	5c	1	5c	B10
07/24/2006	14/2006|H8N4	8b	9A	5c	1	5c	B10
01/03/2015	7/2015|H8N4	6	4C	3b	6C	5e	3e
01/27/2006	2/2006|H9N2	5	1	3b	1	5d	B12
06/05/2006	7/2006|H10N6	1b	1	8a	8A	9	6b
06/11/2006	8/2006|H10N6	1b	1	8a	8A	9	6b
01/14/2006	16/2006|H10N7	5	13	6a	11	4E	1
28/06/2006	42/2006|H11N9	5	2	8d	2B	7	6a
03/23/2007	2/2007|H10N7	8b	10	3a	8A	9	6b
03/26/2007	1/2007|H10N7	1b	9B	2b	1	4E	B9e
01/07/2008	2/2008|H10N7	8a	2	8b	1	6	6a
12/13/2008	67/2008|H10N7	12	12c	5c	11	6	4e
12/14/2008	71/2008|H10N7	12	12c	5c	11	6	4e
02/04/2009	1/2009|H10N7	12	12c	5c	11	6	4e
11/09/2009	30/2009|H10N4	1a	4B	6b	9A	13	6b
09/07/2010	21/2010|H10N7	8b	4A	6b	5	5b	3d
09/07/2010	22/2010|H10N7	8b	4A	6b	5	5b	3d
09/07/2010	23/2010|H10N7	8b	4A	6b	5	5b	3d
12/03/2010	50/2010|H10N7	6	9B	3a	2A	4D	3d
11/26/2010	47/2010|H10N	6	9B	3a	2A	4D	3a
03/08/2011	2/2011|H10N7	6	9B	3a	2A	4D	3a
05/12/2012	5/2012|H10N7	9	12c	3a	9B	5	4b
01/14/2012	1/2012|H10N7	11	4B	3b	10d	4F	4b
05/20/2013	31/2013|H10N7	9	4C	2a	6B	4E	4c
08/05/2013	32/2013|H10N7	9	4C	2a	6B	4E	4c
02/17/2014	1/2014|H10N7	10	4C	5b	6C	4A	2c
02/17/2014	2/2014|H10N7	10	4C	5b	6C	4A	2c
12/16/2014	33/2014|H10N7	10	5	5b	6C	5	4b
03/04/2015	6/2015|H10N7	10	4C	5b	6C	5	4b
09/22/2008	29/2008|H11N9	1b	4A	2b	8B	12	B9a
09/23/2008	36/2008|H11N9	5	4A	8a	9B	4B	1
30/06/2008	M/3641/2008 H11N9	12	9A	3b	5	11	3d
09/02/2009	12/2009|H11N9	5	4B	1	5	5b	5
12/21/2009	29/2009|H11N9	5	12b	2b	9B	13	3d
10/10/2011	26/2011|H11N9	9	12A	4	9B	4D	B11
09/27/2012	23/2012|H11N9	4	4C	3a	6C	3	3c
10/21/2019	M/5712U/2019|H11N6	11	12A	5a	10b	4E	3e
12/22/2008	83/2008|H12N5	6	4A	7	11	5b	B10
08/01/2011	4/2011|H12N5	11	9C	4	13	6	4a
06/05/2015	11/2015|mixed	6	5	3b	6C	4E	8
06/27/2015	22/2015|mixed	11	4C	5b	10c	4A	3c
