# Supplementary material for: Diversity and Reassortment Rate of Influenza a Viruses in Wild Ducks and Gulls
Source: Preprints.org preprint supplement (doi:10.20944/preprints202105.0050.v1), 2021-05-05
Supplement: Supplementary file 3 [file supplementary]

03/23/2008|A|black headed gull|Netherlands|1/2008|H13N6

1

07/18/2012|A|black headed gull|Netherlands|10/4/2012|H13N6  
07/19/2012|A|black headed gull|Netherlands|6/20/2012|H13N6  
07/09/2012|A|black headed gull|Netherlands|6/7/2012|H13N6  
07/09/2012|A|black headed gull|Netherlands|8/20/2012|H13N6  
07/19/2012|A|black headed gull|Netherlands|10/6/2012|H13N6  
07/09/2012|A|black headed gull|Netherlands|5/20/2012|H13N6  
07/02/2012|A|black headed gull|Netherlands|4/0/2012|H13N6  
07/09/2012|A|black headed gull|Netherlands|3/20/2012|H13N6  
06/20/2012|A|black headed gull|Netherlands|9/20/12|H13N6  
07/02/2012|A|black headed gull|Netherlands|26/2012|H13N6  
07/09/2012|A|black headed gull|Netherlands|4/20/2012|H13N6  
07/17/2012|A|black headed gull|Netherlands|6/7/2012|H13N6  
07/02/2012|A|black headed gull|Netherlands|4/20/2012|H13N6  
07/02/2012|A|black headed gull|Netherlands|44/2012|H13N6  
07/09/2012|A|black headed gull|Netherlands|5/2012|H13N6  
07/09/2012|A|black headed gull|Netherlands|5/1/2012|H13N6  
07/09/2012|A|black headed gull|Netherlands|4/0/2012|H13N6  
07/09/2012|A|black headed gull|Netherlands|52/2012|H13N6  
07/16/2012|A|black headed gull|Netherlands|52/2012|H13N6  
07/18/2012|A|black headed gull|Netherlands|10/2/2012|H13N6  
07/17/2012|A|black headed gull|Netherlands|68/2012|H13N6

2

3a

07/15/2016|A|black headed gull|Netherlands|4/2016|mixed  
07/15/2016|A|black headed gull|Netherlands|3/2016|H16N3  
06/30/2015|A|black headed gull|Netherlands|3/2015|H16N3

07/09/2012|A|black headed gull|Netherlands|7/3/2012|H13N6  
07/09/2012|A|black headed gull|Netherlands|17/2012|H13N6  
07/21/2012|A|black headed gull|Netherlands|17/2012|H13N6  
07/09/2012|A|black headed gull|Netherlands|20/2012|H13N6  
07/09/2012|A|black headed gull|Netherlands|55/2012|H13N6  
07/09/2012|A|black headed gull|Netherlands|79/2012|H13N6  
07/09/2012|A|black headed gull|Netherlands|7/2012|H13N6  
07/09/2012|A|black headed gull|Netherlands|62/2012|H13N6  
07/09/2012|A|black headed gull|Netherlands|7/20/2012|H13N6  
07/16/2012|A|black headed gull|Netherlands|65/2012|H13N6  
07/20/2012|A|black headed gull|Netherlands|11/2012|H13N6  
07/20/2012|A|black headed gull|Netherlands|110/2012|H13N6  
07/20/2012|A|black headed gull|Netherlands|109/2012|H13N6  
07/20/2012|A|black headed gull|Netherlands|108/2012|H13N6  
07/20/2012|A|black headed gull|Netherlands|113/2012|H13N6  
07/17/2012|A|black headed gull|Netherlands|92/2012|H13N6  
12/24/2014|A|black headed gull|Netherlands|18/2014|H16N3

3b

06/28/2013|A|black headed gull|Netherlands|2/2013|H16N3  
06/28/2013|A|black headed gull|Netherlands|3/2013|H16N3

3c

06/16/2012|A|black headed gull|Netherlands|2/2012|H13N6  
06/20/2012|A|black headed gull|Netherlands|135/2012|H13N6  
06/20/2012|A|black headed gull|Netherlands|25/2012|H13N6  
06/20/2012|A|black headed gull|Netherlands|119/2012|H13N6  
06/20/2012|A|black headed gull|Netherlands|4/2012|H13N6  
06/20/2012|A|black headed gull|Netherlands|57/2012|H13N6  
06/20/2012|A|black headed gull|Netherlands|130/2012|H13N6  
06/20/2012|A|black headed gull|Netherlands|15/2012|H13N6  
06/20/2012|A|black headed gull|Netherlands|23/2012|H13N6  
06/20/2012|A|black headed gull|Netherlands|28/2012|H13N6  
06/20/2012|A|black headed gull|Netherlands|18/2012|H13N6  
06/20/2012|A|black headed gull|Netherlands|131/2012|H13N6  
06/20/2012|A|black headed gull|Netherlands|137/2012|H13N6  
06/20/2012|A|black headed gull|Netherlands|18/2012|H13N6  
06/20/2012|A|black headed gull|Netherlands|13/2012|H13N6  
06/16/2012|A|black headed gull|Netherlands|12/2012|H13N6  
06/20/2012|A|black headed gull|Netherlands|121/2012|H13N6  
06/20/2012|A|black headed gull|Netherlands|125/2012|H13N6  
06/20/2012|A|black headed gull|Netherlands|14/2012|H13N6  
06/20/2012|A|black headed gull|Netherlands|2012|H13N6  
06/20/2012|A|black headed gull|Netherlands|25/2012|H13N6  
06/20/2012|A|black headed gull|Netherlands|52/2012|H13N6  
06/20/2012|A|black headed gull|Netherlands|134/2012|H13N6  
06/20/2012|A|black headed gull|Netherlands|133/2012|H13N6  
06/20/2012|A|black headed gull|Netherlands|52/2012|H13N6  
06/20/2012|A|black headed gull|Netherlands|34/2012|H13N6  
06/20/2012|A|black headed gull|Netherlands|51/2012|H13N6  
06/20/2012|A|black headed gull|Netherlands|28/2012|H13N6  
06/20/2012|A|black headed gull|Netherlands|25/2012|H13N6

3d

3e

4

5a

5b

5c

6a

6b

6c

6d

7

8

9

10a

10b

10c

11a

11b

11c

12
