# Supplementary material for: Diversity and Reassortment Rate of Influenza a Viruses in Wild Ducks and Gulls
Source: Preprints.org preprint supplement (doi:10.20944/preprints202105.0050.v1), 2021-05-05
Supplement: Supplementary file 3 [file Table S3 H13 viruses.xlsx]

## Sheet:  Table S3 H13
Table S3. Gull IAVs of H13 subtype isolated in Netherlands in 2007-2016
		Clades numbers
Collection date	strain	PB2	PB1	PA	NP	MP	NS
		bhg/Netherlands/xx/2007|H13N6
07/05/2007	6/2007|H13N6	13	5	8	14	11	16a
07/05/2007	2/2007|H13N6	13	5	8	14	11	16a
07/05/2007	4/2007|H13N6	13	5	8	14	11	16a
07/05/2007	10/2007|H13N6	13	5	8	14	11	16a		The subheadings contain the group names of the viruses. The cells contain clade and subclade numbers for the corresponding genes. The cells with the numbers of the isolates, colored ocher, correspond to the strains, all genes of which matching by number of subclade. The cells colored yellow correspond to the gene variants presented in both H13 and H16 viruses. Light green cells indicate a nonpers…
		bhg/Netherlands/xx/2008|H13N8
06/28/2008	19/2008|H13N8	2b	2a	9	6	2b	4
07/06/2008	38/2008|H13N8	2b	2a	9	6	2b	4
06/28/2008	3/2008|H13N8	2b	2a	9	6	2b	4
07/14/2008	35/2008|H13N8	2b	2a	9	6	2b	4
07/06/2008	7/2008|H13N8	2b	2a	9	6	2b	4
07/06/2008	93/2008|H13N8	2b	2a	9	6	2b	4
07/14/2008	96/2008|H13N8	2b	2a	9	6	2b	4
07/15/2008	94/2008|H13N8	2b	2a	9	12	2b	5
07/15/2008	95/2008|H13N8	2b	2a	9	12	2b	5
07/15/2008	102/2008|H13N8	2b	2a	9	12	2b	5
07/15/2008	97/2008|H13N8	2b	2a	9	12	2b	5
07/15/2008	20/2008|H13N8	2b	2a	9	12	2b	5
07/15/2008	18/2008|H13N8	2b	2a	9	12	2b	5
07/15/2008	21/2008|H13N8	2b	2a	9	12	2b	5
07/15/2008	22/2008|H13N8	2b	2a	9	12	2b	5
07/15/2008	23/2008|H13N8	2b	2a	9	12	2b	5
06/28/2008	2/2008|H13N8	2b	2a	9	6	2b	5
06/28/2008	10/2008|H13N8	2b	2a	9	6	2b	5
06/28/2008	16/2008|H13N8	2b	2a	9	6	2b	5
06/28/2008	14/2008|H13N8	2b	2a	9	6	2b	5
06/28/2008	15/2008|H13N8	2b	2a	9	6	2b	6
06/28/2008	55/2008|H13N8	2b	2a	9	6	2b	4
07/14/2008	86/2008|H13N8	2b	2a	11b	6	2b	7
07/14/2008	48/2008|H13N8	2b	2a	11b	6	2b	7
07/14/2008	25/2008|H13N8	2b	2a	11b	6	2b	7
07/14/2008	51/2008|H13N8	3c	2a	11b	13	2b	6
07/14/2008	70/2008|H13N8	3b	2a	11b	12	2b	5
08/29/2008	24/2008|H13N8	2b	2a	11b	12	2b	5
07/06/2008	37/2008|H13N8	3b	2a	11b	3	2a	2d
06/28/2008	11/2008|H13N8	3b	4	11b	3	2a	2a
07/14/2008	83/2008|H13N8	3b	4	11b	3	2a	2a
06/28/2008	13/2008|H13N8	3b	4	11b	3	2a	2a
06/28/2008	5/2008|H13N8	3b	4	11b	3	2a	2a
07/14/2008	88/2008|H13N8	2b	4	11b	3	2a	2b
06/28/2008	12/2008|H13N8	3b	4	11b	3	2a	2b
06/28/2008	8/2008|H13N8	3b	4	11b	3	2a	2b
07/14/2008	66/2008|H13N8	3b	2a	11b	12	2b	4
07/14/2008	49/2008|H13N8	3c	2a	10b	6	2b	14a
07/14/2008	68/2008|H13N8	2b	2a	11b	6	2b	4
07/14/2008	67/2008|H13N8	3b	2a	11b	12	2b	6
07/14/2008	44/2008|H13N8	3b	4	11b	3	2a	2b
07/14/2008	64/2008|H13N8	3b	4	11b	3	2a	2b
		A/bhg/Netherlands/17/2009|H13N3
07/15/2009	17/2009|H13N3	11a	6b	11c	11	10	16b
		bhg/Netherlands/xx/2009|H13N6
07/15/2009	11/2009|H13N6	12	6b	6a	2	10	16b
07/22/2009	29/2009|H13N6	12	6b	6a	2	10	16b
07/09/2009	39/2009|H13N6	12	6b	6a	2	10	16b
		bhg/Netherlands/xx/2009|H13N2
07/09/2009	31/2009|H13N2	12	6b	6a	2	10	16b
07/22/2009	27/2009|H13N2	11a	3d	10a	3	11	2c
07/15/2009	7/2009|H13N2	2b	4	10a	3	5	16b
07/15/2009	8/2009|H13N2	2b	4	10a	3	5	16b
07/15/2009	18/2009|H13N2	3a	1b	10a	7	5	16b
07/15/2009	13/2009|H13N2	3a	1b	10b	7	5	16b
07/09/2009	34/2009|H13N2	3a	1b	10b	7	5	16b
07/09/2009	38/2009|H13N2	3a	1b	10b	7	5	16b
07/02/2009	4/2009|H13N2	3a	1b	10b	7	5	16b
07/02/2009	9/2009|H13N2	3a	1b	10b	7	5	16b
07/15/2009	5/2009|H13N2	3a	1b	10b	7	5	16b
07/02/2009	3/2009|H13N2	3a	1b	10b	7	5	16b
07/02/2009	2/2009|H13N2	3a	1b	10b	7	5	16b
07/02/2009	6/2009|H13N2	3a	1b	10b	7	5	16b
07/02/2009	1/2009|H13N2	2b	4	10a	7	5	16c
07/09/2009	36/2009|H13N2	2b	1b	10a	7	5	16c
07/09/2009	37/2009|H13N2	3a	1b	10a	7	5	16c
07/13/2009	33/2009|H13N2	3a	1b	10a	7	5	13a
		bhg/Netherlands/xx/2010|H13N2
07/14/2010	8/2010|H13N2	2a	6a	6c	10	7a	16b
07/26/2010	13/2010|H13N2	2a	4	10a`	10	3b	11
07/21/2010	10/2010|H13N2	11b	4	10a`	10	3b	16b
		bhg/Netherlands/xx/2010|H13N8
07/14/2010	2/2010|H13N8	2a	6a	6c	10	7b	16b
07/14/2010	4/2010|H13N8	2a	6a	6c	10	7b	16b
07/14/2010	5/2010|H13N8	2a	6a	6c	10	7b	16b
07/21/2010	10/2010|H13N8	11c	6a	10c	15	3d	16b
		bhg/Netherlands/xx/2011|H13N8
06/21/2011	12/2011|H13N8	11c	3c	10c	15	7c	11
06/21/2011	14/2011|H13N8	11c	3c	10c	15	7c	11
06/21/2011	17/2011|H13N8	11c	3c	10c	15	7c	11
06/21/2011	18/2011|H13N8	11c	3c	10c	15	7c	11
06/21/2011	19/2011|H13N8	11c	3c	10c	15	7c	11
06/21/2011	25/2011|H13N8	11c	3c	10c	15	7c	11
06/21/2011	3/2011|H13N8	11c	3c	10c	15	7c	11
06/21/2011	9/2011|H13N8	11c	3c	10c	15	7c	11
07/29/2011	39/2011|H13N8	11c	3c	10c	15	3d	8
		bhg/Netherlands/8/2011|H13N3
06/21/2011	8/2011|H13N3	11b	10	10a	15	3d	2c
		bhg/Netherlands/xx/2013|H13N8
07/06/2013	6/2013|H13N8	8b	8c	10a`	8c	6	10d
07/17/2013	8/2013|H13N8	8b	8a	10a`	8c	3c	10d
07/17/2013	9/2013|H13N8	8b	8a	10a`	8c	3c	10d
		bhg/Netherlands/xx/2014|H13N2
06/30/2014	27/2014|H13N2	9	9a	5a	8c	6	9a
07/09/2014	9/2014|H13N2	9	9a	5a	8c	6	9a
07/09/2014	12/2014|H13N2	9	9a	5a	8c	6	9a
07/09/2014	4/2014|H13N2	5	9a	5a	8c	6	9a
07/09/2014	2/2014|H13N2	5	9a	5a	8c	6	9a
07/09/2014	6/2014|H13N2	5	9a	5a	8c	6	9a
07/09/2014	13/2014|H13N2	5	9a	5a	8c	6	9a
07/09/2014	1/2014|H13N2	5	9a	4	8c	6	9a
06/17/2014	37/2014|H13N2	5	9a	4	8a	6	16b
06/17/2014	24/2014|H13N2	5	9a	4	8a	6	16b
06/17/2014	25/2014|H13N2	5	9a	4	8a	6	16b
06/23/2014	8/2014|H13N2	5	9a	4	8a	6	16b
06/17/2014	23/2014|H13N2	5	9a	4	8a	6	16b
		bhg/Netherlands/xx/2016|H13N2
08/06/2016	11/2016|H13N2	9	8a	5b	8c	7b	16b
07/15/2016	2/2016|H13N2	9	8a	5b	8c	7b	16b
07/15/2016	6/2016|H13N2	9	8a	5b	8c	7b	16b
06/29/2016	7/2016|H13N2	9	8a	5b	8c	7b	16b
08/06/2016	8/2016|H13N2	9	8a	5b	8c	7b	16b
08/06/2016	9/2016|H13N2	9	8a	5b	8c	7b	16b
08/06/2016	10/2016|H13N2	9	8a	5b	8c	7b	16b
		bhg/Netherlands/xx/2014|H13N6
06/23/2014	11/2014|H13N6	8c	9b	6b	8c	3c	10d
07/11/2014	15/2014|H13N6	8c	9b	6b	8c	3c	10d
07/04/2014	28/2014|H13N6	8c	9b	6b	8c	3c	10d
06/23/2014	3/2014|H13N6	8c	9b	6b	8c	3c	10d
07/11/2014	32/2014|H13N6	8c	9b	6b	8c	3c	10d
06/27/2014	5/2014|H13N6	8c	9b	6b	8c	3c	10d
07/11/2014	34/2014|H13N6	8c	9b	6b	8c	3c	10d
07/11/2014	14/2014|H13N6	8c	9b	6b	8c	3c	10d
07/11/2014	17/2014|H13N6	8c	9b	6b	8c	3c	10d
07/11/2014	35/2014|H13N6	8c	9b	6b	8c	3c	10d
07/11/2014	31/2014|H13N6	8c	9b	6b	8c	3c	10d
07/11/2014	29/2014|H13N6	8c	9b	6b	8c	3c	10d
06/23/2014	7/2014|H13N6	8c	9b	6b	8c	3c	10d
06/23/2014	10/2014|H13N6	8c	9b	6b	8c	3c	10d
06/23/2014	26/2014|H13N6	8c	9b	6b	8c	3c	10d
07/11/2014	33/2014|H13N6	8c	9b	6b	8c	3c	10d
07/11/2014	16/2014|H13N6	10	9b	6b	8c	3c	10d
		bhg/Netherlands/xx/2012|H13N6
06/20/2012	124/2012|H13N6	6c	7c	3d	8d	8f	10b
06/20/2012	38/2012|H13N6	6c	7c	3d	8d	8f	10b
06/20/2012	12/2012|H13N6	6c	7c	3d	8d	8f	10b
06/20/2012	15/2012|H13N6	6c	7c	3d	8d	8f	10b
06/20/2012	29/2012|H13N6	6c	7c	3d	8d	8f	10b
06/20/2012	128/2012|H13N6	6c	7c	3d	8d	8f	10b
06/20/2012	24/2012|H13N6	6c	7c	3d	8d	8f	10b
07/20/2012	10/2012|H13N6	6c	7c	3d	8d	8f	10b
06/20/2012	26/2012|H13N6	6a	7d	3d	8d	8f	10b
06/20/2012	27/2012|H13N6	6a	7d	3d	8d	8f	10c
06/20/2012	3/2012|H13N6	6a	7d	3d	8d	8f	10c
06/20/2012	130/2012|H13N6	6a	7d	3d	8d	8f	10c
06/20/2012	4/2012|H13N6	6a	7d	3d	8d	8f	10c
06/20/2012	18/2012|H13N6	6a	7d	3d	8d	8b	10c
06/20/2012	11/2012|H13N6	6c	7d	3d	8d	8b	10b
06/20/2012	22/2012|H13N6	6c	7d	3d	8d	8b	10b
06/20/2012	17/2012|H13N6	6c	7d	3d	8d	8b	10b
06/20/2012	127/2012|H13N6	6c	7d	3d	8d	8b	10b
06/16/2012	1/2012|H13N6	6c	7d	3d	8d	8b	10b
06/20/2012	13/2012|H13N6	6c	7d	3d	8d	8b	10b
06/20/2012	18/2012|H13N6	6a	7d	3d	8d	8b	10c
06/20/2012	8/2012|H13N6	6a	7d	3d	8d	8c	10b
06/20/2012	121/2012|H13N6	6b	7c	3d	8d	8c	10b
06/20/2012	135/2012|H13N6	6b	7c	3d	8d	8a	10c
06/20/2012	16/2012|H13N6	6b	7c	3d	8d	8a	10c
06/20/2012	7/2012|H13N6	6b	7c	3d	8d	8a	10c
06/20/2012	129/2012|H13N6	6b	7c	3d	8d	8a	10c
06/20/2012	123/2012|H13N6	6b	7c	3d	8d	8a	10c
06/20/2012	20/2012|H13N6	6b	7c	3d	8d	8a	10c
06/20/2012	122/2012|H13N6	6b	7c	3d	8d	8a	10c
06/20/2012	21/2012|H13N6	6b	7c	3d	8d	8a	10c
06/20/2012	126/2012|H13N6	6b	7c	3d	8d	8a	10c
06/20/2012	5/2012|H13N6	6c	7c	3d	8d	8c	10c
06/20/2012	131/2012|H13N6	6c	7c	3d	8d	8f	10c
06/20/2012	25/2012|H13N6	6c	7c	3d	8d	8f	10c
06/20/2012	33/2012|H13N6	6b	7c	3d	8d	8a	12
06/20/2012	137/2012|H13N6	6b	7c	3d	8d	8f	10c
06/20/2012	119/2012|H13N6	6b	7c	3d	8d	8f	10c
06/20/2012	125/2012|H13N6	6b	7c	3d	8d	8f	10c
06/20/2012	37/2012|H13N6	6b	7c	3d	8d	8f	10c
06/20/2012	6/2012|H13N6	6b	7c	3d	8d	8f	10c
06/20/2012	9/2012|H13N6	6b	7c	2	8d	8f	10c
06/20/2012	118/2012|H13N6	6b	7c	3d	8d	8b	10c
06/20/2012	14/2012|H13N6	6b	7c	3d	8d	8b	10c
06/20/2012	23/2012|H13N6	6b	7c	3d	8d	8b	10c
06/20/2012	132/2012|H13N6	6b	7c	3d	8d	8b	10c
06/20/2012	36/2012|H13N6	6b	7c	3d	8d	8b	10c
06/20/2012	30/2012|H13N6	6b	7c	3d	8d	8b	10c
06/20/2012	19/2012|H13N6	6b	7c	3d	8d	8b	10c
07/18/2012	101/2012|H13N6	6b	7c	3d	8d	8b	10c
06/20/2012	138/2012|H13N6	6b	7c	3d	8d	8b	10c
07/17/2012	98/2012|H13N6	8a	8e	3b	8d	8e	9a
06/20/2012	35/2012|H13N6	7c	7b	3e	8d	8f	10c
07/17/2012	87/2012|H13N6	7c	8a	2	8d	8b	9a
07/17/2012	115/2012|H13N6	8a	8e	3b	8d	8e	9a
07/17/2012	90/2012|H13N6	8a	8e	3b	8d	8e	9a
07/17/2012	92/2012|H13N6	8a	8e	3b	8d	8e	9a
07/17/2012	96/2012|H13N6	8a	8e	3b	8d	8e	9a
07/17/2012	97/2012|H13N6	8a	8e	3b	8d	8e	9a
07/17/2012	89/2012|H13N6	8a	8e	3b	8d	8e	9a
07/17/2012	91/2012|H13N6	8a	8e	3b	8d	8e	9a
07/17/2012	100/2012|H13N6	7b	7a	3b	8d	8f	10c
07/18/2012	102/2012|H13N6	7b	8b	3a	8d	8a	10c
07/18/2012	104/2012|H13N6	7b	8b	2	8d	8c	9b
06/16/2012	2/2012|H13N6	7b	7b	3d	8d	8f	10a
07/09/2012	61/2012|H13N6	7b	8b	2	8d	8f	9b
07/09/2012	74/2012|H13N6	7b	8b	2	8d	8f	9b
07/09/2012	54/2012|H13N6	7b	8b	2	8d	8f	9b
07/09/2012	66/2012|H13N6	7b	8b	2	8d	8f	9b
07/09/2012	50/2012|H13N6	7b	8b	2	8d	8f	9b
07/09/2012	51/2012|H13N6	7b	8b	2	8d	8f	9b
07/09/2012	52/2012|H13N6	7b	8b	2	8d	8f	9b
07/09/2012	53/2012|H13N6	7b	8b	2	8d	8f	9b
07/09/2012	63/2012|H13N6	7b	8b	2	8d	8f	9b
07/09/2012	68/2012|H13N6	7b	8b	2	8d	8f	9b
07/09/2012	69/2012|H13N6	7b	8b	2	8d	8f	9b
07/16/2012	83/2012|H13N6	7b	8b	2	8d	8f	9b
07/18/2012	103/2012|H13N6	7b	8b	2	8d	8f	9b
07/02/2012	43/2012|H13N6	7b	8b	2	8d	8f	9b
07/02/2012	39/2012|H13N6	7b	7a	2	8d	8a	10c
07/02/2012	46/2012|H13N6	7b	7a	2	8d	8a	10c
07/09/2012	65/2012|H13N6	7b	7a	2	8d	8a	10c
07/02/2012	40/2012|H13N6	7b	7a	2	8d	8c	10b
07/02/2012	44/2012|H13N6	7b	7a	2	8d	8b	10c
07/02/2012	48/2012|H13N6	7b	7a	2	8d	8f	10c
07/09/2012	64/2012|H13N6	7b	7a	2	8d	8c	10c
07/09/2012	67/2012|H13N6	7b	8b	2	8d	8b	9b
07/19/2012	106/2012|H13N6	7c	8b	2	8d	8a	9b
07/02/2012	41/2012|H13N6	7c	7b	3e	8d	8a	10c
07/02/2012	49/2012|H13N6	7c	7b	3e	8d	8a	10c
07/09/2012	70/2012|H13N6	7c	7b	3e	8d	8a	10c
07/02/2012	45/2012|H13N6	7c	7b	3e	8d	8a	10c
07/02/2012	42/2012|H13N6	7c	7b	3e	8d	8a	10c
07/02/2012	47/2012|H13N6	7c	7b	3e	8d	8a	10c
07/09/2012	76/2012|H13N6	7c	7b	3e	8d	8a	10c
06/20/2012	34/2012|H13N6	7c	7b	3e	8d	8a	10c
06/20/2012	134/2012|H13N6	7c	7b	3e	8d	8a	10c
07/16/2012	82/2012|H13N6	7b	8b	3a	8d	8c	9b
06/20/2012	28/2012|H13N6	7c	7b	3e	8d	8c	10c
06/20/2012	31/2012|H13N6	7c	7b	3e	8d	8c	10c
06/20/2012	32/2012|H13N6	7c	7b	3e	8d	8c	10c
07/16/2012	84/2012|H13N6	7b	7a	3b	8d	8a	9b
07/17/2012	88/2012|H13N6	7b	8a	3b	8c	8b	10d
07/17/2012	99/2012|H13N6	7b	7a	3b	8d	8a	10b
06/20/2012	133/2012|H13N6	7c	7b	3e	8d	8f	10b
07/20/2012	113/2012|H13N6	7a	8d	3b	8d	8a	13b
07/20/2012	108/2012|H13N6	7a	8d	3b	8d	8f	13b
07/20/2012	109/2012|H13N6	7a	8d	3b	8d	8f	13b
07/20/2012	112/2012|H13N6	7a	8d	3b	8d	8f	13b
07/20/2012	108/2012|H13N6	7a	8d	3b	8d	8f	13b
07/20/2012	110/2012|H13N6	7a	8d	3b	8d	8f	13b
07/20/2012	111/2012|H13N6	7a	8d	3b	8d	8f	13b
07/21/2012	117/2012|H13N6	7a	8d	3b	8d	8d	13b
07/09/2012	55/2012|H13N6	7a	8d	3b	8d	8d	13b
07/09/2012	57/2012|H13N6	7a	8d	3b	8d	8d	13b
07/09/2012	58/2012|H13N6	7a	8d	3b	8d	8d	13b
07/09/2012	62/2012|H13N6	7a	8d	3b	8d	8d	13b
07/09/2012	72/2012|H13N6	7a	8d	3b	8d	8d	13b
07/09/2012	73/2012|H13N6	7a	8d	3b	8d	8d	13b
07/09/2012	77/2012|H13N6	7a	8d	3b	8d	8d	13b
07/09/2012	78/2012|H13N6	7a	8d	3b	8d	8d	13b
07/16/2012	85/2012|H13N6	7a	8d	3b	8d	8d	13b
07/17/2012	95/2012|H13N6	9	8e	10c	8b	3d	9b
07/17/2012	94/2012|H13N6	9	8e	3b	8b	8d	9a
07/12/2012	81/2012|H13N6	9	8e	3b	8b	8d	9a
07/18/2012	105/2012|H13N6	9	8e	12	8b	4	9a
03/23/2008	1/2008|H1N3	14	12	1	1	13	1
11/20/2009	40/2009|H11N9	14	12	7	1	13	1
