# Supplementary material for: Diversity and Reassortment Rate of Influenza a Viruses in Wild Ducks and Gulls
Source: Preprints.org preprint supplement (doi:10.20944/preprints202105.0050.v1), 2021-05-05
Supplement: Supplementary file 4 [file Table S4 H16 viruses.xlsx]

## Sheet:  Table S4 H16
Table S4. Gull IAVs of H16 subtype isolated in Netherlands in 2007-2017
		Clades numbers
Collection date	Strain	PB2	PB1	PA	NP	MP	NS
		A/black-headed gull/Netherlands/xx/2007|H16N3
07/05/2007	8/2007|H16N3	1	2b	8`	3	3f	15			The subheadings contain the group names of the viruses. The cells contain clade and subclade numbers for the corresponding genes. The cells with the numbers of the isolates, colored ocher, correspond to the strains, all genes of which matching by number of subclade. The cells colored yellow correspond to the gene variants presented in both H13 and H16 viruses. Light green cells indicate a nonpers…
07/05/2007	3/2007|H16N3	1	2b	8`	3	3f	15
07/05/2007	9/2007|H16N3	1	2b	8`	3	3f	15
07/05/2007	7/2007|H16N3	13	5	8`	4	1	15
		A/black-headed gull/Netherlands/xx/2008|H16N3
07/14/2008	69/2008|H16N3	2a	1a	10b	13	3a	14a
07/14/2008	80/2008|H16N3	2a	1a	10b	13	3a	14a
07/14/2008	57/2008|H16N3	2a	1a	10b	13	3a	14a
07/14/2008	50/2008|H16N3	2a	1a	10b	13	3a	14a
07/14/2008	79/2008|H16N3	2a	1a	10b	13	3a	14a
07/14/2008	91/2008|H16N3	2a	1a	10b	13	3a	14a
07/14/2008	89/2008|H16N3	2a	1a	10b	13	3a	14a
07/14/2008	59/2008|H16N3	2a	1a	10b	13	3a	14a
07/14/2008	61/2008|H16N3	2a	1a	10b	13	3a	14a
07/06/2008	27/2008|H16N3	2a	1a	10b	13	3a	14a
07/06/2008	46/2008|H16N3	2a	1a	10b	13	3a	14a
07/06/2008	26/2008|H16N3	2a	1a	10b	13	3a	14a
07/06/2008	41/2008|H16N3	2a	1a	10b	13	3a	14a
07/06/2008	45/2008|H16N3	2a	1a	10b	13	3a	14a
07/06/2008	29/2008|H16N3	2a	1a	10b	13	3a	14a
07/06/2008	47/2008|H16N3	2a	1a	10b	13	3a	14a
07/14/2008	75/2008|H16N3	2a	1a	10b	13	3a	14a
07/14/2008	76/2008|H16N3	2a	1a	10b	13	3a	14a
07/22/2008	28/2008|H16N3	2a	1a	10b	13	3a	14a
07/14/2008	54/2008|H16N3	2a	1a	10b	13	3a	14a
07/14/2008	82/2008|H16N3	2a	1a	10b	13	3a	14a
07/14/2008	85/2008|H16N3	2a	1a	10b	13	3a	14a
07/06/2008	40/2008|H16N3	2a	1a	10b	13	3a	14a
07/14/2008	78/2008|H16N3	2a	1a	10b	13	3a	14a
07/14/2008	56/2008|H16N3	2a	1a	10b	13	3a	14a
07/06/2008	36/2008|H16N3	2a	1a	10b	13	3a	14a
07/14/2008	53/2008|H16N3	2a	1a	10b	13	3a	14a
07/14/2008	81/2008|H16N3	2a	1a	10b	13	3a	14a
07/14/2008	84/2008|H16N3	2a	1a	10b	13	3a	14a
07/14/2008	56/2008|H16N3	2a	1a	10b	13	3a	14a
07/06/2008	36/2008|H16N3	2a	1a	10b	13	3a	14a
07/14/2008	53/2008|H16N3	2a	1a	10b	13	3a	14a
07/06/2008	33/2008|H16N3	1	1a	8	13	3a	14a
07/14/2008	92/2008|H16N3	2a	1a	10b	13	3b	14a
07/06/2008	42/2008|H16N3	2a	1a	11b	13	3a	14a
07/14/2008	63/2008|H16N3	2a	1a	10b	13	3a	14b
		A/black-headed gull/Netherlands/xx/2008|H16N3
07/15/2008	100/2008|H16N3	11a	3a	11c	15	3b	3
07/15/2008	101/2008|H16N3	11a	3a	11c	15	3b	3
07/15/2008	98/2008|H16N3	2a	3a	10c	15	3b	14a
07/15/2008	99/2008|H16N3	2a	3a	10c	15	3b	14a
		A/black-headed gull/Netherlands/xx/2009|H16N3
07/22/2009	23/2009|H16N3	11a	3a	11c	11	3c	2c
07/15/2009	14/2009|H16N3	11a	3a	11c	11	3c	2c
07/15/2009	12/2009|H16N3	11a	3a	11c	11	3c	2c
07/15/2009	15/2009|H16N3	11a	3a	11c	11	3c	2c
07/22/2009	26/2009|H16N3	2b	3a	11c	11	3c	2c
07/15/2009	19/2009|H16N3	11a	3a	6a	11	3c	2c
07/09/2009	32/2009|H16N3	2d	4		16	1	13a
07/09/2009	35/2009|H16N3	11c	3d	10b	7	3b	2e
07/22/2009	25/2009|H16N3	11c	3d	10b	15	3b	2e
07/15/2009	21/2009|H16N3	11c	3d	10b	15	3b	2e
07/22/2009	28/2009|H16N3	11c	3d	10b	15	3b	2e
07/15/2009	16/2009|H16N3	11c	3d	10b	15	3b	2e
07/22/2009	24/2009|H16N3	11c	3d	10b	15	3b	2e
07/22/2009	22/2009|H16N3	11c	3b	10c	15	3b	2e
		A/black-headed gull/Netherlands/xx/2010|H16N3
07/21/2010	14/2010|H16N3	11c	3b	10c	15	3d	2e
07/21/2010	9/2010|H16N3	11c	3b	10c	9	3b	2e
07/21/2010	3/2010|H16N3	11c	3	13	6	7b	16b
07/21/2010	11/2010|H16N3	11c	4	10a	11	3d	13a
		A/black-headed gull/Netherlands/xx/2011|H16N3
06/21/2011	29/2011|H16N3	11c	3c	10c	9	3b	2e
06/21/2011	6/2011|H16N3	11c	3c	10c	9	3b	2e
06/21/2011	28/2011|H16N3	11c	3c	10c	9	3b	2e
06/21/2011	7/2011|H16N3	11c	3c	10c	15	7	9a
		A/black-headed gull/Netherlands/xx/2011|H16N3
06/21/2011	22/2011|H16N3	11b	10	10a	15	3d	2c
06/27/2011	32/2011|H16N3	11b	10	10a	15	3d	2c
06/21/2011	11/2011|H16N3	11b	10	10a	15	3d	2c
06/27/2011	33/2011|H16N3	11b	10	10a	15	3d	2c
06/27/2011	30/2011|H16N3	11b	10	10a	15	3d	2c
06/27/2011	34/2011|H16N3	11b	10	10a	15	3d	2c
06/27/2011	27/2011|H16N3	11b	10	10a	15	3d	2c
06/21/2011	13/2011|H16N3	11b	10	10a	15	3d	2c
06/21/2011	1/2011|H16N3	11b	10	10c	15	3d	2c
06/27/2011	31/2011|H16N3	11b	10c	10a	15	3d	2c
		A/black-headed gull/Netherlands/xx/2012|H16N3
07/19/2012	107/2012|H16N3	10	3c	6d	15	3c	2c
07/21/2012	114/2012|H16N3	10	3c	6d	15	3c	2c
07/17/2012	93/2012|H16N3	11d	3c	10c	15	3d	13b
		A/black-headed gull/Netherlands/xx/2013|H16N3
07/06/2013	4/2013|H16N3	7c	8a	3c	8b	3d	12
07/06/2013	5/2013|H16N3	7c	8a	3c	8b	3d	9a
06/29/2013	2/2013|H16N3	7c	8a	3c	8b	3d	9a
06/29/2013	3/2013|H16N3	7c	8a	3c	8b	3d	9a
		A/black-headed gull/Netherlands/xx/2014|H16N3
07/06/2013	36/2014|H16N3	10	8b	3b	8b	3d	2c
12/24/2014	18/2014|H16N3	7b	8b	3b	8c	7b	13c
		A/black-headed gull/Netherlands/xx/2015|H16N3
06/30/2015	5/2015|H16N3	7c	9a	3b	8a	3c	12
06/30/2015	3/2015|H16N3	7c	9a	3b	8a	3c	12
06/30/2015	2/2015|H16N3	7c	9a	3b	8a	3c	10c
06/30/2015	4/2015|H16N3	7c	9a	3b	8a	3c	16b
01/27/2015	1/2015|H16N3	7c	9b	5c		3d	9a
		A/lbbg/N/1/2015|H16N3
09/18/2015	1/2015|H16N3	10	8a	6b	8c	7b	16b
		A/black-headed gull/Netherlands/xx/2016|H16N3
07/15/2016	1/2016|H16N3	5	12	3b	8a	3d	9a
07/15/2016	3/2016|H16N3	5	12	3b	8a	3d	9a
		A/black-headed gull/Netherlands/xx/2017|H16N3
07/03/2017	5/2017|H16N	7c	9b	5b	8c	3d	9a
07/15/2009	10/2009|mixed	4	11	10b	15	3b	2e
07/15/2016	4/2016|mixed	5	12	3b	8a	3d	9a
07/15/2009	20/2009|mixed	11a	3a	10b	7	12	16b
06/21/2011	16/2011|mixed	11c	10	10c	15	7c	11
07/06/2008	34/2008|mixed	2a	1a	10b	13	3a	14a
07/06/2008	31/2008|mixed	2b	1a	11a	5	3e	5
07/14/2008	90/2008|mixed	3b	1a	11b	3	3a	14a
