# Supplementary material for: Diversity and Reassortment Rate of Influenza a Viruses in Wild Ducks and Gulls
Source: Preprints.org preprint supplement (doi:10.20944/preprints202105.0050.v1), 2021-05-05
Supplement: Supplementary file 5 [file Table S5 duck and gull viruses.xlsx]

## Sheet: Table S5 duck and gull viruses
				duck viruses									H13 gull viruses										H16 gull viruses
Strain	HA	NA	PB2	PB1	PA	NP	MP	NS		Strain	HA	NA	PB2	PB1	PA	NP	MP	NS		Strain	HA	NA	PB2	PB1	PA	NP	MP	NS		Figure S1. Genome constellations of IAVs isolated from ducks and gulls in the Netherlands in 2007-2009. Сolors in each column depict clades of the indicated gene segment on the phylogenetic tree
30/2006|H1N4	1	4	8	1	9	10	6	6	07/05/2007	6/2007|H13N6	13	6	13	5	8	4	11	16		8/2007|H16N3	16	3	1	2	8	3	3	15
23/2006|H1N1	1	1	8	9	8	8	8	2	07/05/2007	2/2007|H13N6	13	6	13	5	8	4	11	16		3/2007|H16N3	16	3	1	2	8	3	3	15
46/2006|H1N1	1	1	12	1	2	11	11	11	07/05/2007	4/2007|H13N6	13	6	13	5	8	4	11	16		9/2007|H16N3	16	3	1	2	8	3	3	15
64/2006|H1N1	1	1	8	1	2	11	11	13	07/05/2007	10/2007|H13N6	13	6	13	5	8	4	11	16		7/2007|H16N3	16	3	13	5	8	4	1	15
16/2009|H1N1	1	1	8	12	5	10	5	9
25/2009|H1N1	1	1	12	4	6	3	5	5	06/28/2008	19/2008|H13N8	13	8	2	2	9	7	2	4		69/2008|H16N3	16	3	2	1	10		3	14
26/2009|H1N1	1	1	5	4	1	5	5	5	07/06/2008	38/2008|H13N8	13	8	2	2	9	7	2	4		80/2008|H16N3	16	3	2	1	12	12	3	14
28/2009|H1N1	1	1	5	4	6	5	5	5	06/28/2008	3/2008|H13N8	13	8	2	2	9	7	2	4		57/2008|H16N3	16	3	2	1	10	12	3	14
51/2010|H1N1	1	1	9	11	2	12	5	2	07/14/2008	35/2008|H13N8	13	8	2	2	9	7	2	4		50/2008|H16N3	16	3	2	1	10	12	3	14
53/2010|H1N1	1	1	10	2	2	12	11	9	07/06/2008	7/2008|H13N8	13	8	2	2	9	7	2	4		79/2008|H16N3	16	3	2	1	10	12	3	14
37/2011|H1N1	1	1	5	2	2	6	3	4	07/06/2008	93/2008|H13N8	13	8	2	2	9	7	2	4		91/2008|H16N3	16	3	2	1	10	12	3	14
6/2012|H1N1	1	1	9	7	3	8	7	4	07/14/2008	96/2008|H13N8	13	8	2	2	9	7	2	4		89/2008|H16N3	16	3	2	1	10	12	3	14
7/2012|H1N1	1	1	9	8	2	8	7	4								7				59/2008|H16N3	16	3	2	1	10	12	3	14
8/2012|H1N1	1	1	4	9	3	8	7	4	07/15/2008	94/2008|H13N8	13	8	2	2	9	12	2	5		61/2008|H16N3	16	3	2	1	10	12	3	14
20/2012|H1N1	1	1	10	7	2	6	7	4	07/15/2008	95/2008|H13N8	13	8	2	2	9	12	2	5		27/2008|H16N3	16	3	2	1	10	12	3	14
5/2013|H1N1	1	1	10	7	2	6	7	4	07/15/2008	102/2008|H13N8	13	8	2	2	9	12	2	5		46/2008|H16N3	16	3	2	1	10	12	3	14
M/4970/2013 H1N1	1	1	6	5	8	9	3	9	07/15/2008	97/2008|H13N8	13	8	2	2	9	12	2	5		26/2008|H16N3	16	3	2	1	10	12	3	14
23/2014|H1N1	1	1	10	4	4	6	3	3	07/15/2008	20/2008|H13N8	13	8	2	2	9	12	2	5		41/2008|H16N3	16	3	2	1	10	12	3	14
26/2014|H1N1	1	1	10	4	4	6	3	3	07/15/2008	18/2008|H13N8	13	8	2	2	9	12	2	5		45/2008|H16N3	16	3	2	1	10	12	3	14
18/2014|H1N1	1	1	4	4	5	8	12	11	07/15/2008	21/2008|H13N8	13	8	2	2	9	12	2	5		29/2008|H16N3	16	3	2	1	10	12	3	14
M/5586/2018 H1N2	1	2	11	11	5	9	3	6	07/15/2008	22/2008|H13N8	13	8	2	2	9	12	2	5		47/2008|H16N3	16	3	2	1	10	12	3	14
M/5662/2018 H1N2	1	2	11	11	5	9	3	6	07/15/2008	23/2008|H13N8	13	8	2	2	9	12	2	5		75/2008|H16N3	16	3	2	1	10	12	3	14
																				76/2008|H16N3	16	3	2	1	10	12	3	14
M/5743/2019|H1N1	1	1	6	5	2	9	3	11	06/28/2008	2/2008|H13N8	13	8	2	2	9	6	2	5		28/2008|H16N3	16	3	2	1	10	12	3	14
M/5744/2019|H1N1	1	1	6	5	2	9	3	11	06/28/2008	10/2008|H13N8	13	8	2	2	9	6	2	5		54/2008|H16N3	16	3	2	1	10	12	3	14
									06/28/2008	16/2008|H13N8	13	8	2	2	9	6	2	5		82/2008|H16N3	16	3	2	1	10	12	3	14
14/2007|H2N2	2	2	1	2	6	8	6	6	06/28/2008	14/2008|H13N8	13	8	2	2	9	6	2	5		85/2008|H16N3	16	3	2	1	10	12	3	14
12/2008|H2N3	2	3	12	2	9	1	3	6												40/2008|H16N3	16	3	2	1	10	12	3	14
37/2008|H2N3	2	3	8	8	6	12	3	3	06/28/2008	15/2008|H13N8	13	8	2	2	9	6	2	6		78/2008|H16N3	16	3	2	1	10	12	3	14
58/2008|H2N3	2	3	8	8	6	12	3	3	06/28/2008	55/2008|H13N8	13	8	2	2	9	6	2	4		56/2008|H16N3	16	3	2	1	10	12	3	14
1/2010|H2N3	2	3	10	12	8	8	12	10	07/14/2008	86/2008|H13N8	13	8	2	2	11	6	2	7		36/2008|H16N3	16	3	2	1	10	12	3	14
29/2010|H2N3	2	3	12	11	2	12	3	11	07/14/2008	48/2008|H13N8	13	8	2	2	11	6	2	7		53/2008|H16N3	16	3	2	1	10	12	3	14
31/2006|H2N2	2	2	5	10	3	2	10	6	07/14/2008	25/2008|H13N8	13	8	2	2	11	6	2	7		81/2008|H16N3	16	3	2	1	10	12	3	14
22/2013|H2N3	2	3	10	9	5	8	4	3	07/14/2008	51/2008|H13N8	13	8	3	2	11	13	2	6		84/2008|H16N3	16	3	2	1	10	12	3	14
14/2014|H2N9	2	9	10	9	8	9	3	11	07/14/2008	70/2008|H13N8	13	8	3	2	11	12	2	5		56/2008|H16N3	16	3	2	1	10	12	3	14
16/2014|H2N9	2	9	10	9	8	9	3	11	08/29/2008	24/2008|H13N8	13	8	2	2	11	12	2	5		36/2008|H16N3	16	3	2	1	10	12	3	14
24/2011|H2N3	2	3	10	2	4	8	3	4	07/06/2008	37/2008|H13N8	13	8	3	2	11	3	2	2		53/2008|H16N3	16	3	2	1	10	12	3	14
25/2011|H2N3	2	3	8	4	2	12	5	12	06/28/2008	11/2008|H13N8	13	8	3	4	11	3	2	2		33/2008|H16N3	16	3	1	1	7	12	3	14
33/2011|H2N2	2	2	10	11	8	12	3	13	07/14/2008	83/2008|H13N8	13	8	3	4	11	3	2	2		92/2008|H16N3	16	3	2	1	10	12	3	14
									06/28/2008	13/2008|H13N8	13	8	3	4	11	3	2	2		42/2008|H16N3	16	3	2	1	12	12	3	14
3/2006|H3N8	3	8	1	9	8	1	2	4	06/28/2008	5/2008|H13N8	13	8	3	4	11	3	2	2		63/2008|H16N3	16	3	2	1	10		3	14
34/2006|H3N8	3	8	5	8	8	2	12	3	07/14/2008	88/2008|H13N8	13	8	2	4	11	3	2	2
60/2006|H3N8	3	8	1	9	8	1	2	4	06/28/2008	12/2008|H13N8	13	8	3	4	11	3	2	2		100/2008|H16N3	16	3	11	3	12	15	3	3
6/2008|H3N6	3	6	5	9	2	2	5	2	06/28/2008	8/2008|H13N8	13	8	3	4	11	3	2	2		101/2008|H16N3	16	3	11	3	12	15	3	3
7/2008|H3N8	3	8	5	9	2	1	5	2	07/14/2008	66/2008|H13N8	13	8	3	2	11	12	2	4
39/2008|H3N2	3	2	8	8	2	2	12	13	07/14/2008	49/2008|H13N8	13	8	3	2	10	6	2	14		98/2008|H16N3	16	3	2	3	10	15	3	14
51/2008|H3N2	3	2	8	8	2	5	5	13	07/14/2008	49/2008|H13N8	13	8	3	2	10	6	2	14		99/2008|H16N3	16	3	2	3	10	15	3	14
62/2008|H3N6	3	6	8	4	8	8	6	1
M/3556/2008 H3N1	3	1	12	12	7	2	11	3	07/14/2008	68/2008|H13N8	13	8	2	2	11	6	2	4		23/2009|H16N3			11	3	12	11	3	2
M/3806/2009 H3N8	3	8	11	4	6	9	2	11	07/14/2008	67/2008|H13N8	13	8	3	2	11	12	2	6		14/2009|H16N3			11	3	12	11	3	2
13/2009|H3N3	3	3	5	4	1	5	4	5	07/14/2008	44/2008|H13N8	13	8	3	4	11	3	2	2		12/2009|H16N3	16	3	11	3	12	11	3	2
30/2010|H3N8	3	8	5	11	2	1	3	9	07/14/2008	64/2008|H13N8	13	8	3	4	11	3	2	2		15/2009|H16N3	16	3	11	3	12	11	3	2
34/2010|H3N2	3	2	9	8	3	12	12	11												26/2009|H16N3			2	3	12	11	3	2
M/4238/2010 H3N6	3	6	4	4	3	8	9	2	07/15/2009	17/2009|H13N3	13	3	11	6	11	11	10	16		19/2009|H16N3	16	3	11	3	6	11	3	2
M/4298/2010 H3N8	3	8	4	8	1	9	5	4	07/15/2009	11/2009|H13N6	13	6	12	6	6	2	10	16		32/2009|H16N3	16	3	2	4		15	1	13
M/4203/2010 H3N8	3	8	4	4	3	8	9	2	07/22/2009	29/2009|H13N6	13	6	12	6	6	2	10	16		35/2009|H16N3	16	3	11	3	10	7	3	2
M/4242/2010 H3N8	3	8	12	11	2	9	2	6	07/09/2009	39/2009|H13N6	13	6	12	6	6	2	10	16		25/2009|H16N3	16	3	11	3	10	15	3	2
17/2011|H3N8	3	8	10	11	8	9	8	2												21/2009|H16N3	16	3	11	3	10	15	3	2
M/4494/2011 H3N8	3	8	4	4	5	9	7	4	07/09/2009	31/2009|H13N2	13	2	12	6	6	2	10	16		28/2009|H16N3	16	3	11	3	10	15	3	2
M/4681/2011 H3N8	3	8	4	4	5	9	7	4	07/22/2009	27/2009|H13N2	13	2	11	3	10	3	11	2		16/2009|H16N3	16	3	11	3	10	15	3	2
M/4661/2011 H3N8	3	8	12	8	6	9	3	3	07/15/2009	7/2009|H13N2	13	2	2	4	10	3	5	16		24/2009|H16N3	16	3	11	3	10	15	3	2
M/4524/2011 H3N2	3	2	4	4	5	9	7	4	07/15/2009	8/2009|H13N2	13	2	2	4	10	3	5	16		22/2009|H16N3	16	3	11	3	10	15	3	2
M/4524/2011 H3N8	3	8	4	4	5	9	7	4	07/15/2009	18/2009|H13N2	13	2	3	1	10	7	5	16
13/2012|H3N8	3	8	10	4	3	12	12	3	07/15/2009	13/2009|H13N2	13	2	3	1	10	7	5	16		14/2010|H16N3	16	3	11	3	10	15	3	2
M/4788/2012 H3N8	3	8	4	4	3	9	9	4	07/09/2009	34/2009|H13N2	13	2	3	1	10	7	5	16		9/2010|H16N3	16	3	11	3	10	9	3	2
M/4780/2012|H3N8	3	8	4	8	5	4	2	12	07/09/2009	38/2009|H13N2	13	2	3	1	10	7	5	16		3/2010|H16N3			11	3	13	6	7	16
16/2012|H3N2	3	2	4	9	3	6	3	6	07/02/2009	4/2009|H13N2	13	2	3	1	10	7	5	16		11/2010|H16N3	16	3	11	4	10	11	3	13
21/2013|H3N2	3	2	4	9	3	6	3	6	07/02/2009	9/2009|H13N2	13	2	3	1	10	7	5	16
									07/15/2009	5/2009|H13N2	13	2	3	1	10	7	5	16		29/2011|H16N3	16	3	11	3	10	9	3	2
2/2013|H3N6	3	6	10	5	5	9	5	2	07/02/2009	3/2009|H13N2	13	2	3	1	10	7	5	16		6/2011|H16N3	16	3	11	3	10	9	3	2
3/2013|H3N6	3	6	10	5	5	9	5	2	07/02/2009	2/2009|H13N2	13	2	3	1	10	7	5	16		28/2011|H16N3	16	3	11	3	10	9	3	2
6/2013|H3N8	3	8	9	11	3	5	7	3	07/02/2009	6/2009|H13N2	13	2	3	1	10	7	5	16		7/2011|H16N3	16	3	11	3	10	15	7	9
8/2013|H3N8	3	8	10	11	5	6	3	3	07/02/2009	1/2009|H13N2	13	2	2	4	10	7	5	16
29/2013|H3N8	3	8	4	5	8	4	2	9	07/09/2009	36/2009|H13N2	13	2	2	1	10	7	5	16		22/2011|H16N3	16	3	11	10	10	15	3	2
M/5037/2014|H3N8	3	8	11	5	5	9	8	3	07/09/2009	37/2009|H13N2	13	2	3	1	10	7	5	16		32/2011|H16N3	16	3	11	10	10	15	3	2
56/2015|H3N2	3	2	11	5	5	6	3	11	07/13/2009	33/2009|H13N2	13	2	3	1	10	7	5	13		11/2011|H16N3	16	3	11	10	10	15	3	2
37/2015|H3N8	3	8	6	5	5	6	5	4												33/2011|H16N3	16	3	11	10	10	15	3	2
21/2016|H3N2	3	2	6	4	5	6	3	4	07/14/2010	8/2010|H13N2	13	2	2	6	6	10	7	16		30/2011|H16N3	16	3	11	10	10	15	3	2
									07/26/2010	13/2010|H13N2	13	2	2	4	10 `	10	3	11		34/2011|H16N3	16	3	11	10	10	15	3	2
6/2006|H4N6	4	6	1	1	8	1	2	10	07/21/2010	10/2010|H13N2	13	2	11	4	10 `	10	3	16		27/2011|H16N3	16	3	11	10	10	15	3	2
53/2006|H4N2	4	2	12	3	6	10	4	11												13/2011|H16N3	16	3	11	10	10	15	3	2
18/2007|H4N6	4	6	1	9	8	5	3B	6	07/14/2010	2/2010|H13N8	13	8	2	6	6	10	7	16		1/2011|H16N3	16	3	11	10	10	15	3	2
55/2008|H4N6	4	6	6	4	6	1	4	6	07/14/2010	4/2010|H13N8	13	8	2	6	6	10	7	16		31/2011|H16N3	16	3	11	10	10	15	3	2
70/2008|H4N6	4	6	6	9	8	12	2	4	07/14/2010	5/2010|H13N8	13	8	2	6	6	10	7	16
M/3661/2008 H4N6	4	6	12	12	7	11	6	3	07/21/2010	10/2010|H13N8	13	8	11	6	10	15	3	16		107/2012|H16N3	16	3	10	3	6	15	3	2
27/2009|H4N6	4	6	2	8	1	9	5	11												114/2012|H16N3	16	3	10	3	6	15	3	2
M/3735/2009 H4N6	4	6	3	8	1	9	1	11	06/21/2011	12/2011|H13N8	13	8	11	3	10	15	7	11		93/2012|H16N3	16	3	11	3	10	15	3	13
M/3740/2009 H4N6	4	6	2	8	1	9	5	11	06/21/2011	14/2011|H13N8	13	8	11	3	10	15	7	11
M/3799/2009 H4N6	4	6	2	8	1	9	1	11	06/21/2011	17/2011|H13N8	13	8	11	3	10	15	7	11		4/2013|H16N3	16	3	7	8	3	8	3	12
26/2010|H4N6	4	6	10	11	2	8	3	9	06/21/2011	18/2011|H13N8	13	8	11	3	10	15	7	11		5/2013|H16N3	16	3	7	8	3	8	3	9
49/2010|H4N6	4	6	5	8	2	9	4	4	06/21/2011	19/2011|H13N8	13	8	11	3	10	15	7	11		2/2013|H16N3	16	3	7	8	3	8	3	9
7/2011|H4N6	4	6	10	11	1	9	4	3	06/21/2011	25/2011|H13N8	13	8	11	3	10	15	7	11		3/2013|H16N3	16	3	7	8	3	8	3	9
22/2011|H4N6	4	6	1	5	2	12	3F	6	06/21/2011	3/2011|H13N8	13	8	11	3	10	15	7	11
M/4643/2011 H4N6	4	6	10	9	8	8	3	2	06/21/2011	9/2011|H13N8	13	8	11	3	10	15	7	11		36/2014|H16N3	16	3	10	8	3	8	3	2
M/4518/2011 H4N6	4	6	12	8	5	8	5	2	07/29/2011	39/2011|H13N8	13	8	11	3	10	15	3	8		18/2014|H16N3	16	3	7	8	3	8	7	13
M/4528/2011 H4N6	4	6	12	4	5	10	5	4	06/21/2011	8/2011|H13N3	13	3	11	10	10	15	3	2
M/4641/2011 H4N6	4	6	12	4	5	9	5	4												5/2015|H16N3	16	3	7	9	3	8	3	12
18/2012|H4N2	4	2	4	4	3	6	7	2	07/06/2013	6/2013|H13N8	13	8	8	8	10	6	6	10		3/2015|H16N3	16	3	7	9	3	8	3	12
19/2012|H4N6	4	6	10	8	8	8	7	4	07/17/2013	8/2013|H13N8	13	8	8	8	10	6	3	10		2/2015|H16N3	16	3	7	9	3	8	3	10
M/4781/2012 H4N6	4	6	4	4	3	9	7	3	07/17/2013	9/2013|H13N8	13	8	8	8	10	6	3	10		4/2015|H16N3	16	3	7	9	3	8	3	16
M/4771/2012 H4N6	4	6	6	4	3	3	7	4												1/2015|H16N3	16	3	7	9	5	2	3	9
M/4843/2012 H4N6	4	6	4	4	3	3	7	4	06/30/2014	27/2014|H13N2	13	2	9	9	5	6	6	9
24/2013|H4N6	4	6	9	4	5	4	3	11	07/09/2014	9/2014|H13N2	13	2	9	9	5	6	6	9		1/2015|H16N3			10	8	6	8	7	16
10/2013|H4N6	4	6	4	11	2	5	3	2	07/09/2014	12/2014|H13N2	13	2	9	9	5	6	6	9							1
30/2014|H4N6	4	6	4	5	4	6	3	4	07/09/2014	4/2014|H13N2	13	2	5	9	5	6	6	9		1/2016|H16N3	16	3	5	12	3	8	3	9
21/2014|H4N6	4	6	10	11	8	9	1	2	07/09/2014	2/2014|H13N2	13	2	5	9	5	6	6	9		3/2016|H16N3	16	3	5	12	3	8	3	9
33/2015|H4N6	4	6	4	7	4	9	3	11	07/09/2014	6/2014|H13N2	13	2	5	9	5	6	6	9
35/2015|H4N6	4	6	11	8	1	9	3	11	07/09/2014	13/2014|H13N2	13	2	5	9	5	6	6	9
27/2017|H4N6	4	6	10	11	5	9	1	11	07/09/2014	1/2014|H13N2	13	2	5	9	4	6	6	9
73/2017|H4N6	4	6	10	12	5	10	4	11	06/17/2014	37/2014|H13N2	13	2	5	9	4	6	6	16
89/2017|H4N6	4	6	10	12	5	10	4	11	06/17/2014	24/2014|H13N2	13	2	5	9	4	6	6	16
									06/17/2014	25/2014|H13N2	13	2	5	9	4	6	6	16
12/2006|H5N2	5	2	13	10	3	2	2	6	06/23/2014	8/2014|H13N2	13	2	5	9	4	6	6	16
36/2006|H5N3	5	3	1	6	5	10	4	4f	06/17/2014	23/2014|H13N2	13	2	5	9	4	6	6	16
43/2006|H5N2	5	2	12	6	3	10	4	10
63/2006|H5N2	5	2	8	8	3	10	2	10	08/06/2016	11/2016|H13N2	13	2	9	8	5	8	7	16
1/2008|H5N3	5	3	5	12	8	1	12	10	07/15/2016	2/2016|H13N2	13	2	9	8	5	8	7	16
28/2008|H5N2	5	2	12	4	7	7	2	9	07/15/2016	6/2016|H13N2	13	2	9	8	5	8	7	16
30/2008|H5N3	5	3	1	4	6	1	12	6	06/29/2016	7/2016|H13N2	13	2	9	8	5	8	7	16
38/2008|H5N3	5	3	1	4	6	8	3B	11	08/06/2016	8/2016|H13N2	13	2	9	8	5	8	7	16
52/2008|H5N2	5	2	12	8	8	1	12	6	08/06/2016	9/2016|H13N2	13	2	9	8	5	8	7	16
5/2009|H5N2	5	2	8	8	6	12	2	10	08/06/2016	10/2016|H13N2	13	2	9	8	5	8	7	16
19/2009|H5N3	5	3	1	4	6	11	13	3
20/2009|H5N3	5	3	1	4	6	11	13	3	06/23/2014	11/2014|H13N6	13	6	8	9	6	8	3	10
28/2010|H5N2	5	2	12	4	2	4	12	6	07/11/2014	15/2014|H13N6	13	6	8	9	6	8	3	10
M/4182/2010 H5N3	5	3	11	4	2	9	2	3	07/04/2014	28/2014|H13N6	13	6	8	9	6	8	3	10
32/2011|H5N2	5	2	4	8	6	9	2	13	06/23/2014	3/2014|H13N6	13	6	8	9	6	8	3	10
M/4952/2013 H5N3	5	3	11	4	5	9	6	2	07/11/2014	32/2014|H13N6	13	6	8	9	6	8	3	10
M/4971/2013 H5N3	5	3	4	4	6	9	9	2	06/27/2014	5/2014|H13N6	13	6	8	9	6	8	3	10
41/2015|H5N1	15	1	4	4	5	9	3	4	07/11/2014	34/2014|H13N6	13	6	8	9	6	8	3	10
52/2015|H5N6	5	6	4	4	5	9	3	4	07/11/2014	14/2014|H13N6	13	6	8	9	6	8	3	10
									07/11/2014	17/2014|H13N6	13	6	8	9	6	8	3	10
g/M/3100/2006 H6N2	6	2	1	9	7	1	6	6	07/11/2014	35/2014|H13N6	13	6	8	9	6	8	3	10
40/2006|H6N8	6	8	12	3	3	7	12	10	07/11/2014	31/2014|H13N6	13	6	8	9	6	8	3	10
71/2006|H6N2	6	2	12	9	8	12	8	12	07/11/2014	29/2014|H13N6	13	6	8	9	6	8	3	10
78/2006|H6N8	6	8	8	9	3	9	12	4	06/23/2014	7/2014|H13N6	13	6	8	9	6	8	3	10
11/2007|H6N	6	5	8	11	8	9	4C	9	06/23/2014	10/2014|H13N6	13	6	8	9	6	8	3	10
13/2007|H6N5	6	5	8	11	8	9	4C	9	06/23/2014	26/2014|H13N6	13	6	8	9	6	8	3	10
15/2007|H6N8	6	8	12	9	8	2	11	7	07/11/2014	33/2014|H13N6	13	6	8	9	6	8	3	10
16/2007|H6N8	6	8	12	9	3	2	5	13	07/11/2014	16/2014|H13N6	13	6	10	9	6	8	3	10
19/2007|H6N2	6	2	6	4	3	1	11	9
3/2008|H6N2	6	2	7	9	2	2	1	3	06/20/2012	124/2012|H13N6	13	6	6	7	3	8	8	10
5/2008|H6N8	6	8	12	12	8	1	7	10	06/20/2012	38/2012|H13N6	13	6	6	7	3	8	8	10
32/2008|H6N1	6	1	1	10	5	1	6	3	06/20/2012	12/2012|H13N6	13	6	6	7	3	8	8	10
31/2008|H6N1	6	1	1	10	5	1	6	3	06/20/2012	15/2012|H13N6	13	6	6	7	3	8	8	10
8/2008|H6N1	6	1	1	10	5	1	6	3	06/20/2012	29/2012|H13N6	13	6	6	7	3	8	8	10
76/2008|H6N8	6	8	12	8	8	4	6	13	06/20/2012	128/2012|H13N6	13	6	6	7	3	8	8	10
15/2009|H6N8	6	8	8	12	5	10	12	9	06/20/2012	24/2012|H13N6	13	6	6	7	3	8	8	10
17/2009|H6N8	6	8	12	8	2	5	3	9	07/20/2012	10/2012|H13N6	13	6	6	7	3	8	8	10
18/2009|H6N2	6	2	12	4	8	4	3	6	06/20/2012	26/2012|H13N6	13	6	6	7	3	8	8	10
24/2009|H6N1	6	1	1	12	2	6	3	10	06/20/2012	18/2012|H13N6	13	6	6	7	3	8	8	10
M/3720/2009|H6N2	6	2	6	4	2	3	11	11	06/20/2012	8/2012|H13N6	13	6	6	7	3	8	8	10
18/2010|H6N8	6	8	10	8	6	8	4	3	06/20/2012	27/2012|H13N6	13	6	6	7	3	8	8	10
M/4031/2010|H6N2	6	2	12	4	2	12	12	3	06/20/2012	3/2012|H13N6	13	6	6	7	3	8	8	10
1/2011|H6N2	6	2	9	11	8	8	3	2	06/20/2012	130/2012|H13N6	13	6	6	7	3	8	8	10
15/2011|H6N8	6	8	4	4	3	6	3	11	06/20/2012	4/2012|H13N6	13	6	6	7	3	8	8	10
20/2011|H6N8	6	8	4	4	3	6	3	11	06/20/2012	18/2012|H13N6	13	6	6	7	3	8	8	10
30/2011|H6N4	6	4	10	5	8	9	3	3	06/20/2012	11/2012|H13N6	13	6	6	7	3	8	8	10
10/2012|H6N1	6	1	9	4	2	8	12	11	06/20/2012	22/2012|H13N6	13	6	6	7	3	8	8	10
12/2012|H6N1	6	1	12	4	3	6	3	2	06/20/2012	17/2012|H13N6	13	6	6	7	3	8	8	10
9/2013|H6N8	6	8	6	4	3	6	2	2	06/20/2012	127/2012|H13N6	13	6	6	7	3	8	8	10
11/2014|H6N2	6	2	10	5	4	9	3	9	06/16/2012	1/2012|H13N6	13	6	6	7	3	8	8	10
9/2014|H6N2	6	2	10	5	3	6	3	11	06/20/2012	13/2012|H13N6	13	6	6	7	3	8	8	10
7/2014|H6N2	6	2	10	5	4	9	5	9	06/20/2012	121/2012|H13N6	13	6	6	7	3	8	8	10
59/2015|H6N5	6	5	10	12	5	6	4	4	07/20/2012	113/2012|H13N6	13	6	7	9	3	8	8	13
60/2015|H6N5	6	5	10	12	5	6	4	4	06/20/2012	135/2012|H13N6	13	6	6	7	3	8	8	10
									06/20/2012	16/2012|H13N6	13	6	6	7	3	8	8	10
									06/20/2012	7/2012|H13N6	13	6	6	7	3	8	8	10
									06/20/2012	129/2012|H13N6	13	6	6	7	3	8	8	10
29/2006|H7N2	7	2	1	9	8	8	6	7	06/20/2012	123/2012|H13N6	13	6	6	7	3	8	8	10
22/2007|H7N1	7	1	8	6	8	1	8	6	06/20/2012	20/2012|H13N6	13	6	6	7	3	8	8	10
60/2008|H7N1	7	1	3	4	8	2	9	11	06/20/2012	122/2012|H13N6	13	6	6	7	3	8	8	10
61/2008|H7N1	7	1	3	4	8	2	9	11	06/20/2012	21/2012|H13N6	13	6	6	7	3	8	8	10
77/2008|H7N1	7	1	5	9	6	10	3B	3	06/20/2012	126/2012|H13N6	13	6	6	7	3	8	8	10
78/2008|H7N1	7	1	5	9	6	10	6	3	06/20/2012	5/2012|H13N6	13	6	6	7	3	8	8	10
82/2008|H7N7	7	7	12	9	8	12	3	9	06/20/2012	131/2012|H13N6	13	6	6	7	3	8	8	10
86/2008|H7N1	7	1	12	8	8	8	4	3	06/20/2012	25/2012|H13N6	13	6	6	7	3	8	8	10
2/2009|H7N7	7	7	12	4	3	3	7	3	06/20/2012	33/2012|H13N6	13	6	6	7	3	8	8	12
3/2009|H7N7	7	7	12	4	3	3	7	3	06/20/2012	137/2012|H13N6	13	6	6	7	3	8	8	10
4/2009|H7N7	7	7	12	4	3	3	7	3	06/20/2012	119/2012|H13N6	13	6	6	7	3	8	8	10
6/2009|H7N7	7	7	12	4	3	3	7	3	06/20/2012	125/2012|H13N6	13	6	6	7	3	8	8	10
7/2009|H7N7	7	7	12	4	3	3	7	3	06/20/2012	37/2012|H13N6	13	6	6	7	3	8	8	10
4/2010|H7N3	7	3	12	2	6	5	5b	6	06/20/2012	6/2012|H13N6	13	6	6	7	3	8	8	10
5/2010|H7N3	7	3	12	2	6	5	5b	6	06/20/2012	9/2012|H13N6	13	6	6	7	2	8	8	10
1/2011|H7N7	7	7	11	8	7	12	4	2	06/20/2012	118/2012|H13N6	13	6	6	7	3	8	8	10
40/2011|H7N1	7	1	4	12	1	6	5	9	06/20/2012	14/2012|H13N6	13	6	6	7	3	8	8	10
43/2011|H7N1	7	1	4	12	1	6	5	9	06/20/2012	23/2012|H13N6	13	6	6	7	3	8	8	10
44/2011|H7N1	7	1	4	12	1	6	5	9	06/20/2012	132/2012|H13N6	13	6	6	7	3	8	8	10
31/2012|H7N1	7	1	4	12	1	6	5	9	06/20/2012	36/2012|H13N6	13	6	6	7	3	8	8	10
31/2012|H7N1	7	1	4	12	1	6	5	9	06/20/2012	30/2012|H13N6	13	6	6	7	3	8	8	10
1/2013|H7N7	7	7	10	8	6	4	4	4	06/20/2012	19/2012|H13N6	13	6	6	7	3	8	8	10
11/2013|H7N7	7	7	10	7	5	6	7	9	07/18/2012	101/2012|H13N6	13	6	6	7	3	8	8	10
13/2013|H7N7	7	7	10	7	5	6	7	9	06/20/2012	138/2012|H13N6	13	6	6	7	3	8	8	10
23/2013|H7N3	7	3	12	7	8	6	12	4	07/17/2012	98/2012|H13N6	13	6	8	9	3	8	8	9
8/2014|H7N5	7	5	10	11	5	6	3	4	06/20/2012	35/2012|H13N6	13	6	7	7	3	8	8	10
24/2014|H7N3	7	3	10	11	5	6	3	4	07/17/2012	87/2012|H13N6	13	6	7	9	2	8	8	9
3/2015|H7N7	7	7	10	12	1	5	4	11	07/17/2012	115/2012|H13N6	13	6	8	9	3	8	8	9
2/2015|H7N7	7	7	10	12	1	5	4	11	07/17/2012	90/2012|H13N6	13	6	8	9	3	8	8	9
18/2015|H7N7	7	7	11	4	5	9	3	11	07/17/2012	92/2012|H13N6	13	6	8	9	3	8	8	9
									07/17/2012	96/2012|H13N6	13	6	8	9	3	8	8	9
11/2006|H8N4	8	4	8	9	5	1	5c	10	07/17/2012	97/2012|H13N6	13	6	8	9	3	8	8	9
13/2006|H8N4	8	4	8	9	5	1	5c	10	07/17/2012	89/2012|H13N6	13	6	8	9	3	8	8	9
14/2006|H8N4	8	4	8	9	5	1	5c	10	07/17/2012	91/2012|H13N6	13	6	8	9	3	8	8	9
7/2015|H8N4	8	4	6	4	3	6	5	3	07/17/2012	100/2012|H13N6	13	6	7	7	3	8	8	10
									07/18/2012	102/2012|H13N6	13	6	7	9	3	8	8	10
2/2006|H9N2	9	2	5	1	3	1	5	12	07/18/2012	104/2012|H13N6	13	6	7	9	2	8	8	9
									06/16/2012	2/2012|H13N6	13	6	7	7	3	8	8	10
7/2006|H10N6	10	6	1	1	8	8	9	6	07/09/2012	61/2012|H13N6	13	6	7	9	2	8	8	9
8/2006|H10N6	10	6	1	1	8	8	9	6	07/09/2012	74/2012|H13N6	13	6	7	9	2	8	8	9
16/2006|H10N7	10	7	5	12	6	10	3	1	07/09/2012	54/2012|H13N6	13	6	7	9	2	8	8	9
1/2007|H10N7	10	7	1	8	2	1	3	9	07/09/2012	66/2012|H13N6	13	6	7	9	2	8	8	9
2/2007|H10N7	10	7	8	9	3	7	8	6	07/09/2012	50/2012|H13N6	13	6	7	9	2	8	8	9
2/2008|H10N7	10	7	8	2	8	1	6	6	07/09/2012	51/2012|H13N6	13	6	7	9	2	8	8	9
67/2008|H10N7	10	7	12	12	5	11	6	4	07/09/2012	52/2012|H13N6	13	6	7	9	2	8	8	9
71/2008|H10N7	10	7	12	12	5	11	6	4	07/09/2012	53/2012|H13N6	13	6	7	9	2	8	8	9
1/2009|H10N7	10	7	12	12	5	11	6	4	07/09/2012	63/2012|H13N6	13	6	7	9	2	8	8	9
30/2009|H10N4	10	4	1	4	6	8	12	6	07/09/2012	68/2012|H13N6	13	6	7	9	2	8	8	9
21/2010|H10N7	10	7	8	4	6	5	5b	3	07/09/2012	69/2012|H13N6	13	6	7	9	2	8	8	9
22/2010|H10N7	10	7	8	4	6	5	5b	3	07/16/2012	83/2012|H13N6	13	6	7	9	2	8	8	9
23/2010|H10N7	10	7	8	4	6	5	5b	3	07/18/2012	103/2012|H13N6	13	6	7	9	2	8	8	9
50/2010|H10N7	10	7	6	8	3	2	3	3	07/02/2012	43/2012|H13N6	13	6	7	9	2	8	8	9
47/2010|H10N	10	7	6	9	3	2	4	3	07/02/2012	39/2012|H13N6	13	6	7	7	2	8	8	10
2/2011|H10N7	10	7	6	9	3	2	4	3	07/02/2012	46/2012|H13N6	13	6	7	7	2	8	8	10
1/2012|H10N7	10	7	11	4	3	9	3F	4	07/09/2012	65/2012|H13N6	13	6	7	7	2	8	8	10
5/2012|H10N7	10	7	9	11	3	8	5	4	07/02/2012	40/2012|H13N6	13	6	7	7	2	8	8	10
31/2013|H10N7	10	7	9	4	2	6	4	4	07/02/2012	44/2012|H13N6	13	6	7	7	2	8	8	10
32/2013|H10N7	10	7	9	4	2	6	4	4	07/02/2012	48/2012|H13N6	13	6	7	7	2	8	8	10
33/2014|H10N7	10	7	10	5	5	6	5	4	07/02/2012	41/2012|H13N6	13	6	7	7	3	8	8	10
1/2014|H10N7	10	7	10	4	5	6	4	2	07/02/2012	49/2012|H13N6	13	6	7	7	3	8	8	10
2/2014|H10N7	10	7	10	4	5	6	4	2	07/09/2012	70/2012|H13N6	13	6	7	7	3	8	8	10
6/2015|H10N7	10	7	10	4	5	6	5	4	07/02/2012	45/2012|H13N6	13	6	7	7	3	8	8	10
									07/02/2012	42/2012|H13N6	13	6	7	7	3	8	8	10
42/2006|H11N9	11	9	5	2	8	2	7	9	07/02/2012	47/2012|H13N6	13	6	7	7	3	8	8	10
29/2008|H11N9	11	9	1	4	2	7	11	9	07/09/2012	76/2012|H13N6	13	6	7	7	3	8	8	10
36/2008|H11N9	11	9	5	4	8	8	3B	1	06/20/2012	34/2012|H13N6	13	6	7	7	3	8	8	10
M/3641/2008 H11N9	11	9	12	8	3	5	10	3	06/20/2012	134/2012|H13N6	13	6	7	7	3	8	8	10
12/2009|H11N9	11	9	5	4	1	5	4	5	06/20/2012	28/2012|H13N6	13	6	7	7	3	8	8	10
29/2009|H11N9	11	9	5	11	2	8	12	3	06/20/2012	31/2012|H13N6	13	6	7	7	3	8	8	10
26/2011|H11N9	11	9	9	11	4	8	3	11	06/20/2012	32/2012|H13N6	13	6	7	7	3	8	8	10
23/2012|H11N9	11	9	4	4	3	6	2	3	07/09/2012	64/2012|H13N6	13	6	7	7	2	8	8	10
M/5712/2019|H11N6	11	6	11	11	5	9	3	3	07/09/2012	67/2012|H13N6	13	6	7	9	2	8	8	9
									07/16/2012	82/2012|H13N6	13	6	7	9	3	8	8	9
83/2008|H12N5	12	5	6	4	7	10	4	10	07/16/2012	84/2012|H13N6	13	6	7	7	3	8	8	9
4/2011|H12N5	12	5	11	8	4	12	6	4	07/17/2012	88/2012|H13N6	13	6	7	9	3	8	8	10
									07/17/2012	99/2012|H13N6	13	6	7	7	3	8	8	10
11/2015|mixed	?	?	6	5	3	6	3	8	07/19/2012	106/2012|H13N6	13	6	7	9	2	8	8	9
22/2015|mixed	?	?	11	4	5	9	3	3	06/20/2012	133/2012|H13N6	13	6	7	7	3	8	8	10
									07/20/2012	108/2012|H13N6	13	6	7	9	3	8	8	13
										109/2012|H13N6	13	6	7	9	3	8	8	13
										112/2012|H13N6	13	6	7	9	3	8	8	13
										108/2012|H13N6	13	6	7	9	3	8	8	13
										110/2012|H13N6	13	6	7	9	3	8	8	13
										111/2012|H13N6	13	6	7	9	3	8	8	13
										117/2012|H13N6	13	6	7	9	3	8	8	13
										55/2012|H13N6	13	6	7	9	3	8	8	13
										57/2012|H13N6	13	6	7	9	3	8	8	13
										58/2012|H13N6	13	6	7	9	3	8	8	13
										62/2012|H13N6	13	6	7	9	3	8	8	13
										72/2012|H13N6	13	6	7	9	3	8	8	13
										73/2012|H13N6	13	6	7	9	3	8	8	13
										77/2012|H13N6	13	6	7	9	3	8	8	13
										78/2012|H13N6	13	6	7	9	3	8	8	13
										85/2012|H13N6	13	6	7	9	3	8	8	13
										95/2012|H13N6	13	6	9	9	10	8	3	9
										94/2012|H13N6	13	6	9	9	3	8	8	9
										81/2012|H13N6	13	6	9	9	3	8	8	9
										105/2012|H13N6	13	6	9	9	12	8	4	9
